# Supplementary figures and images for: MiR‐599 Protects Cardiomyocytes against Oxidative Stress‐Induced Pyroptosis
Source: Hindawi journal article supplement (doi:10.1155/2021/3287053), 2021-01-01

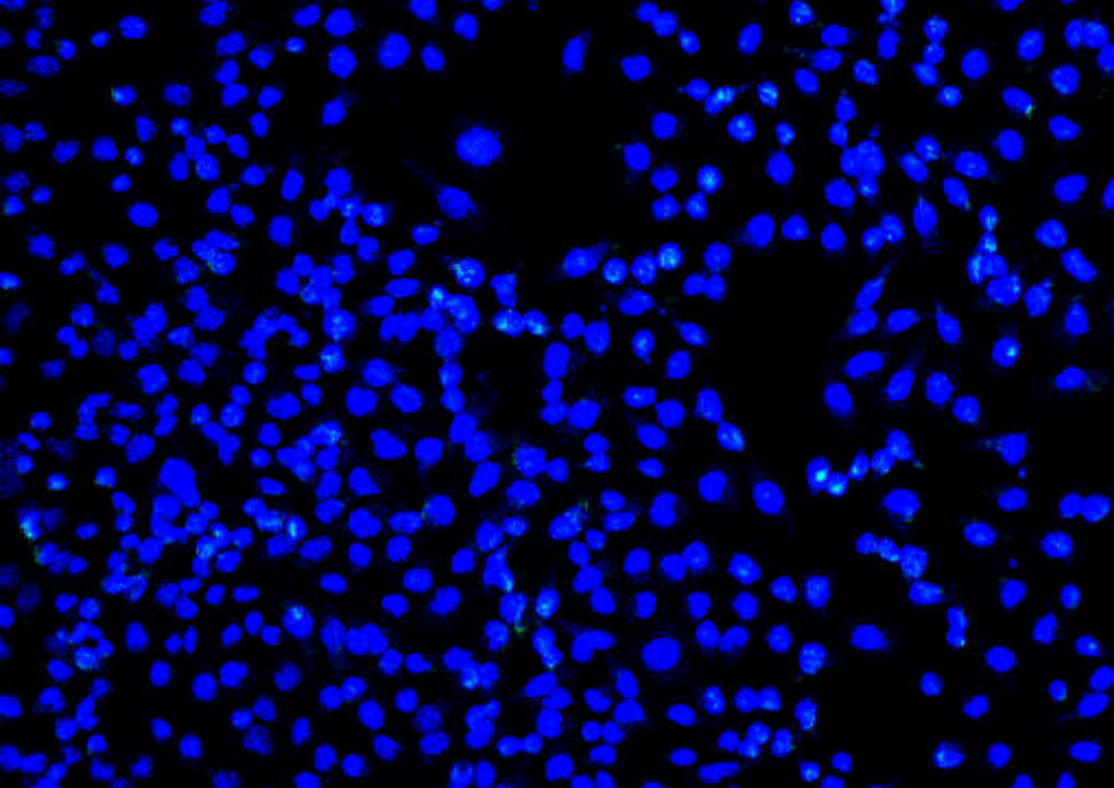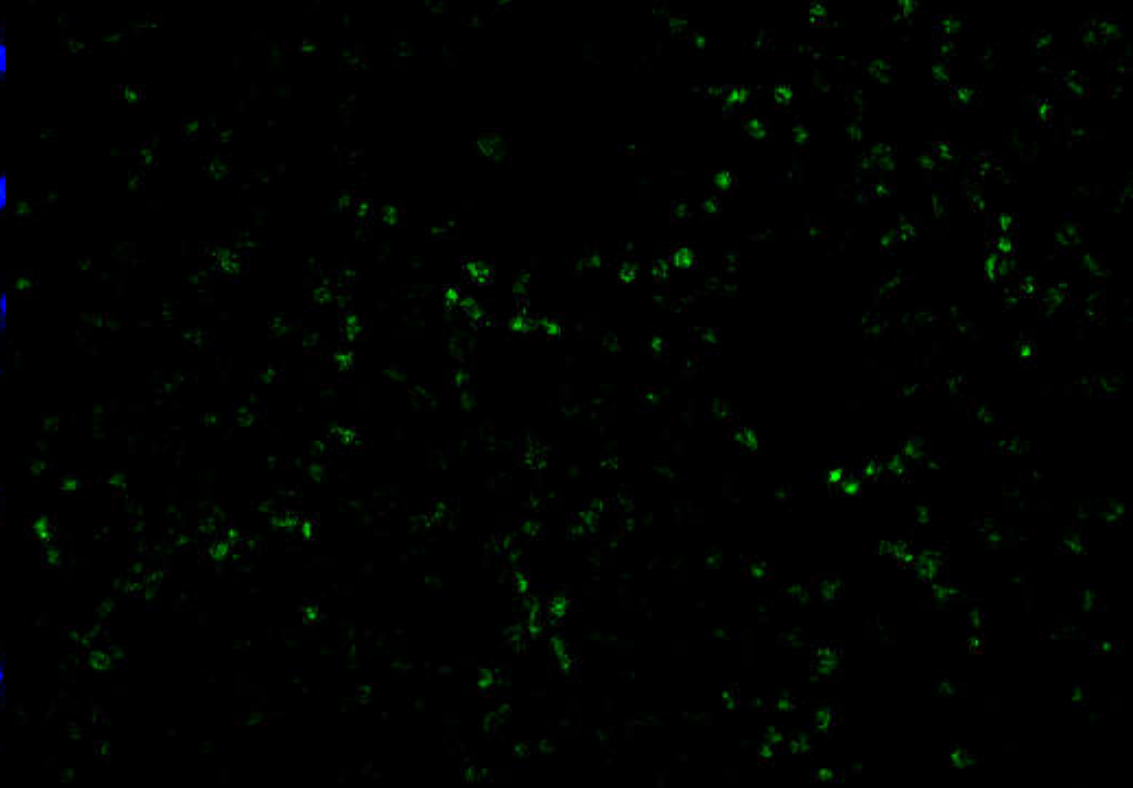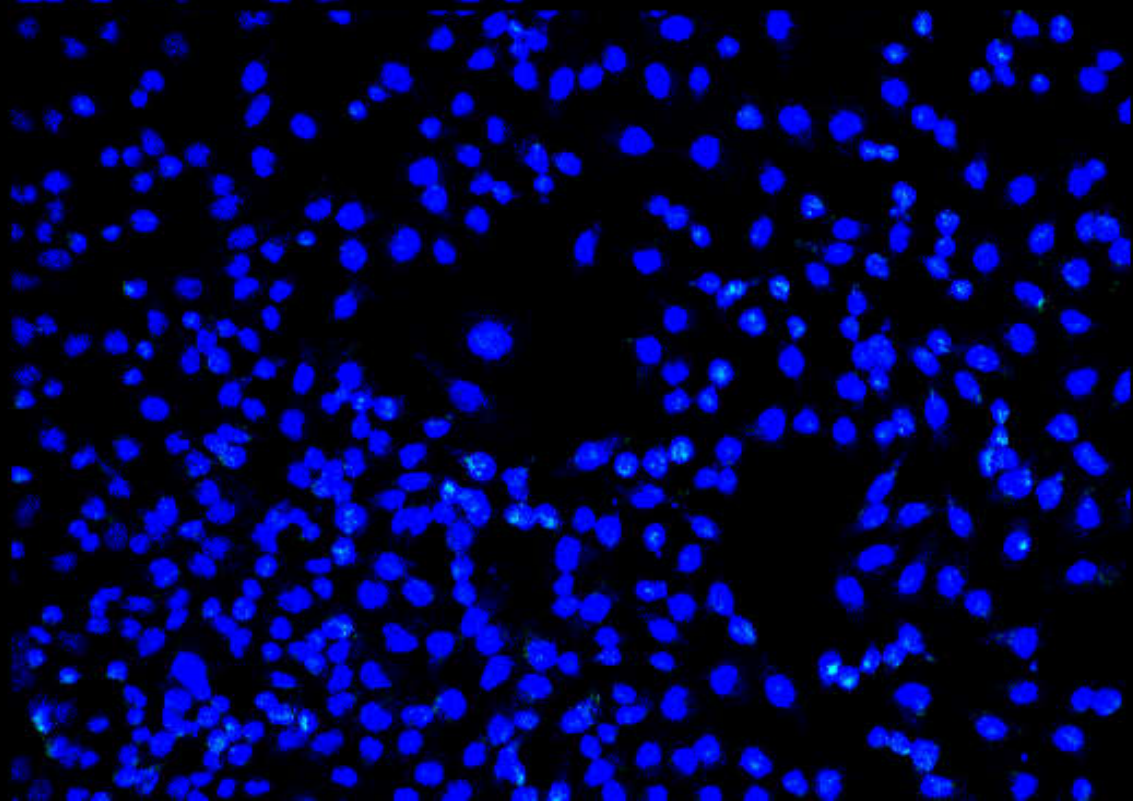







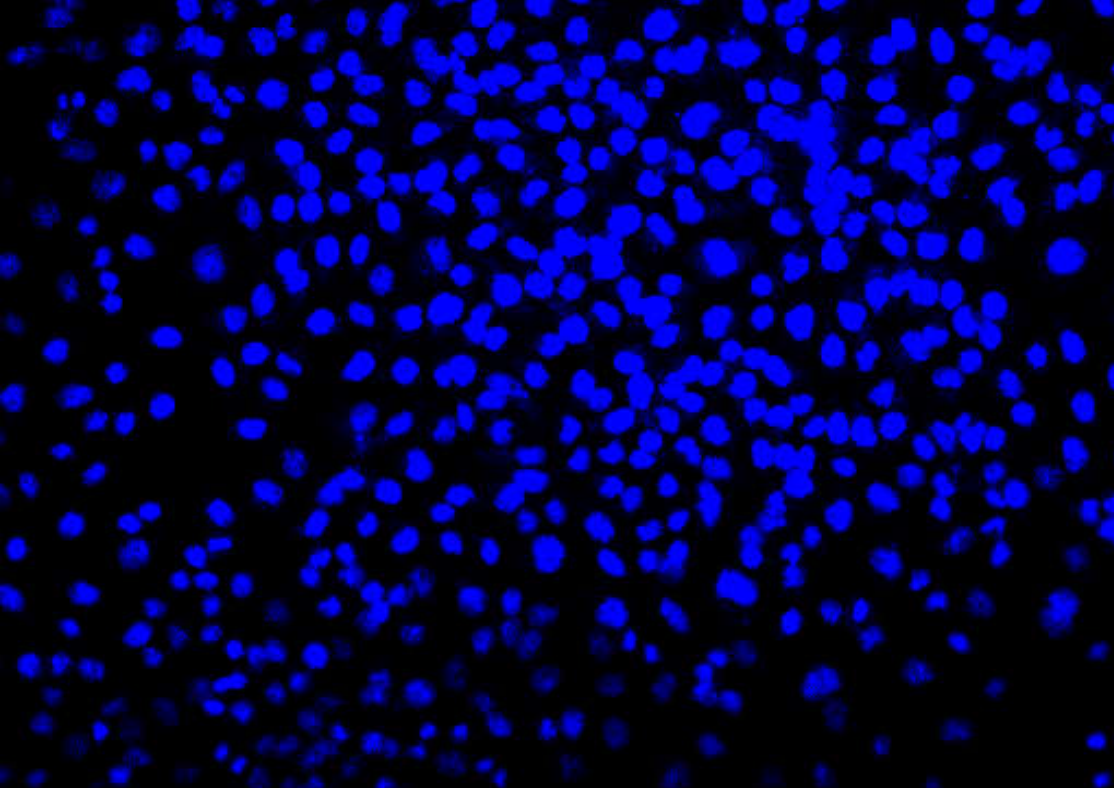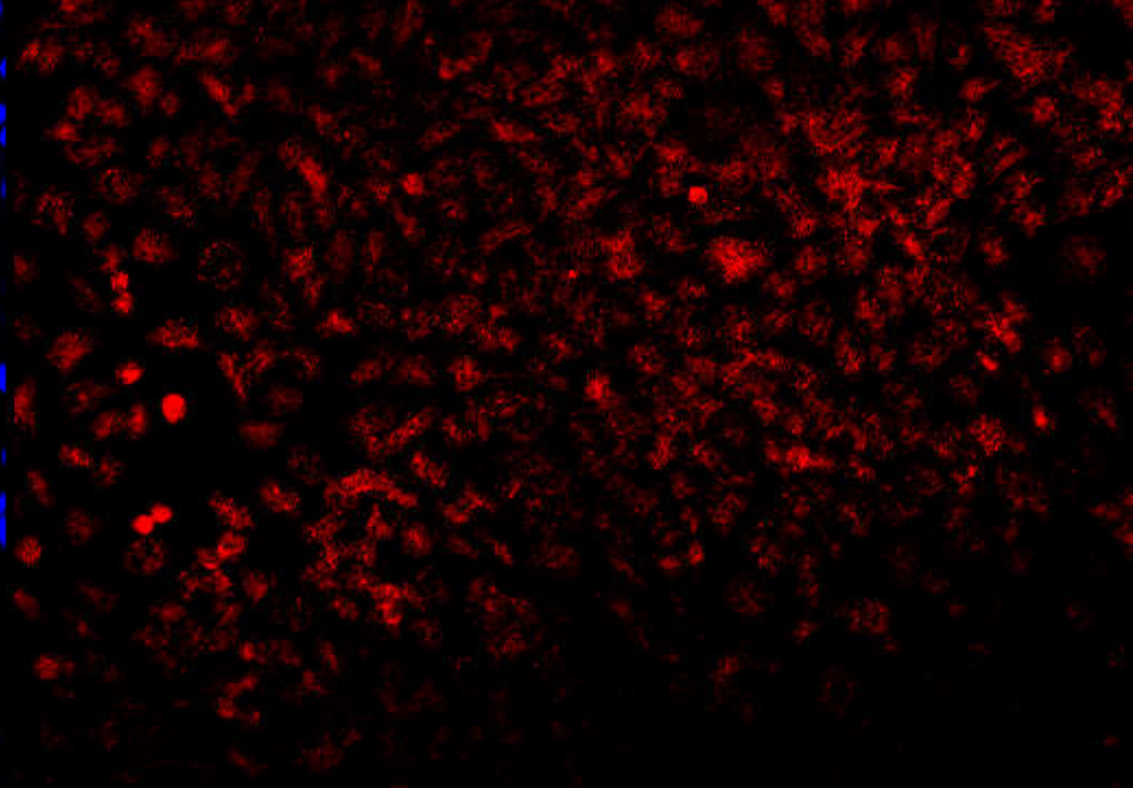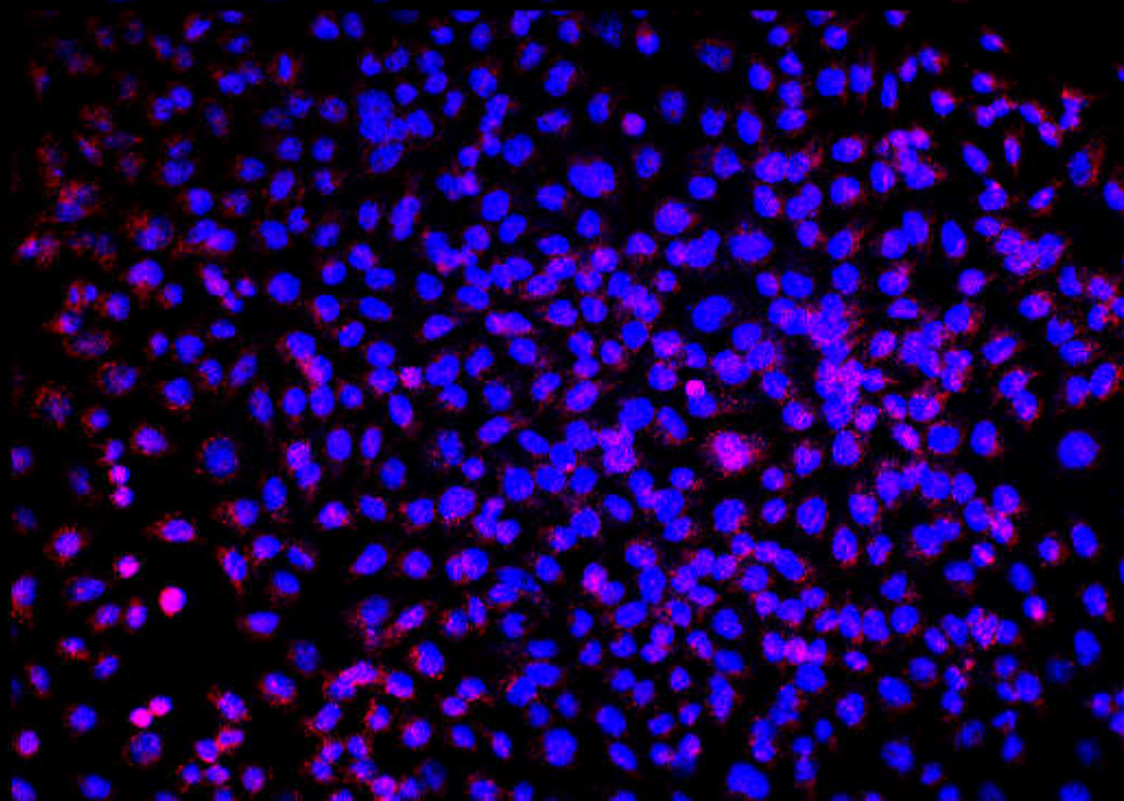







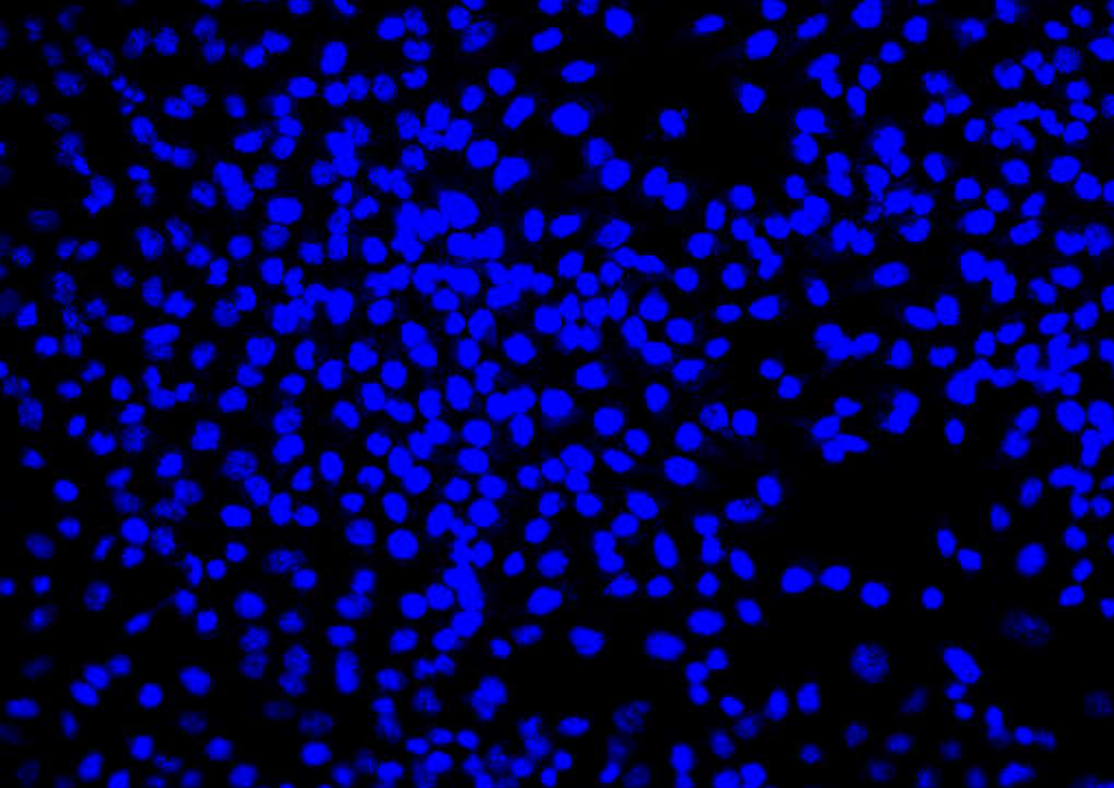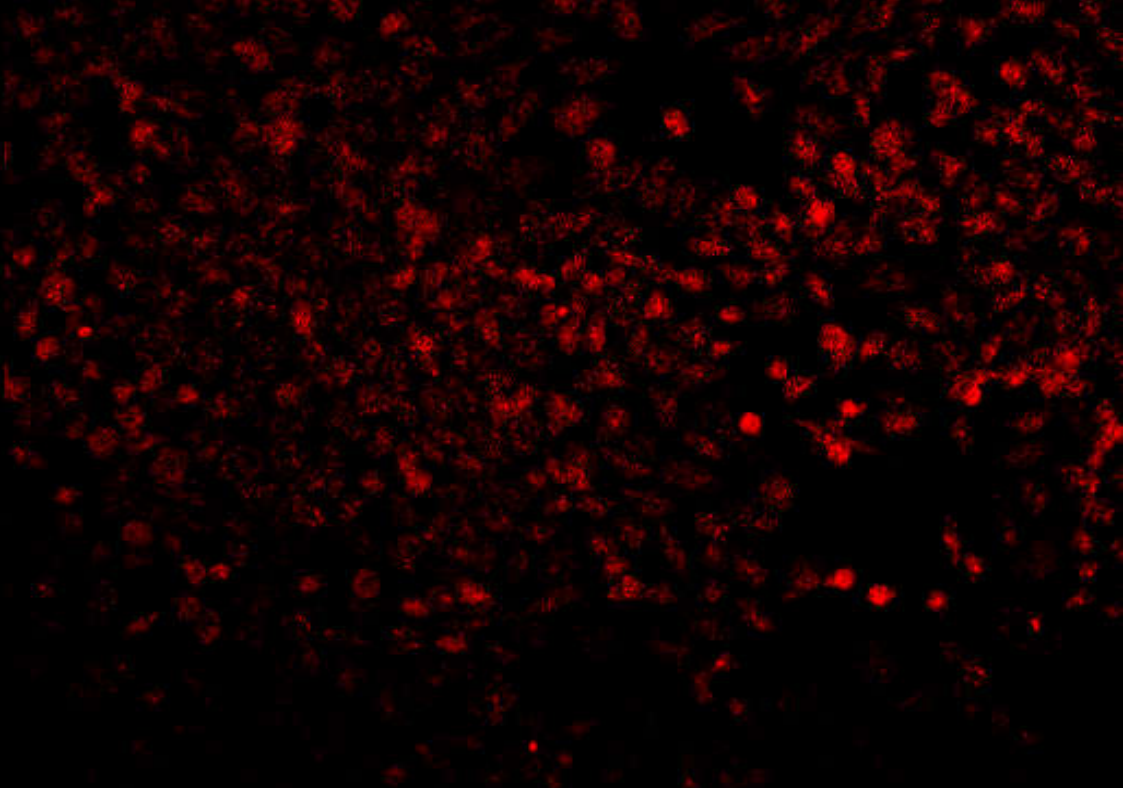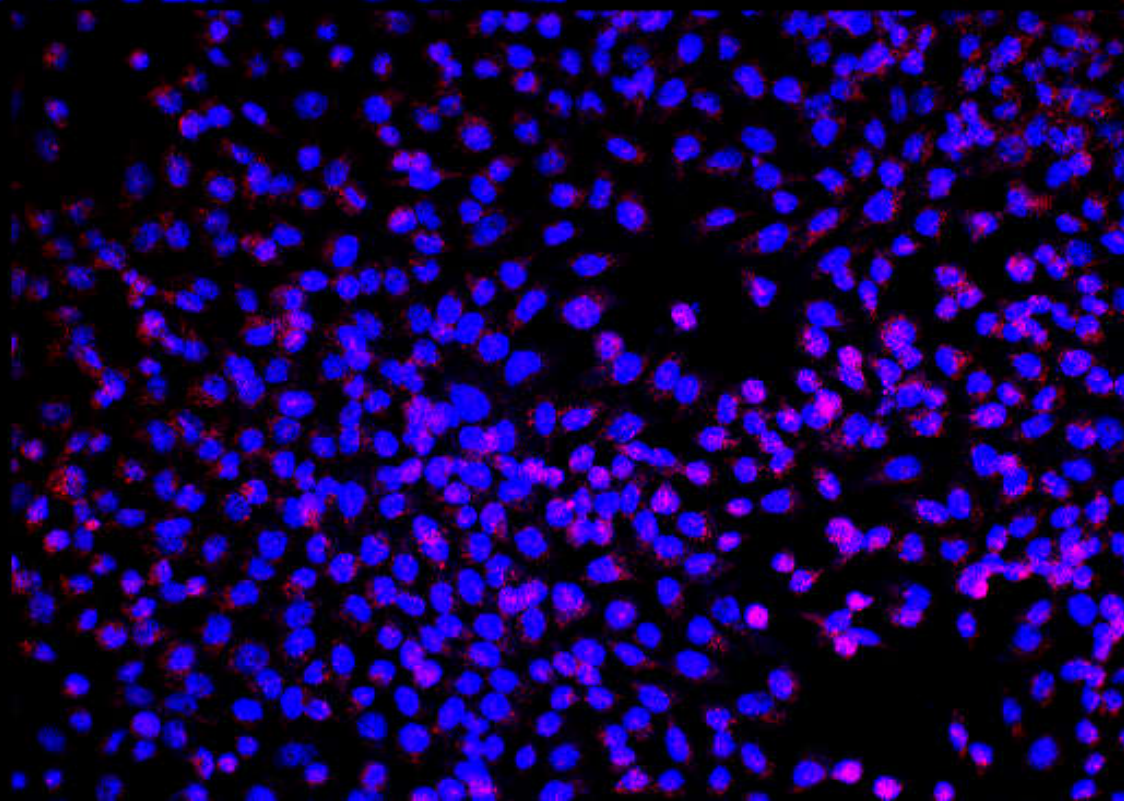







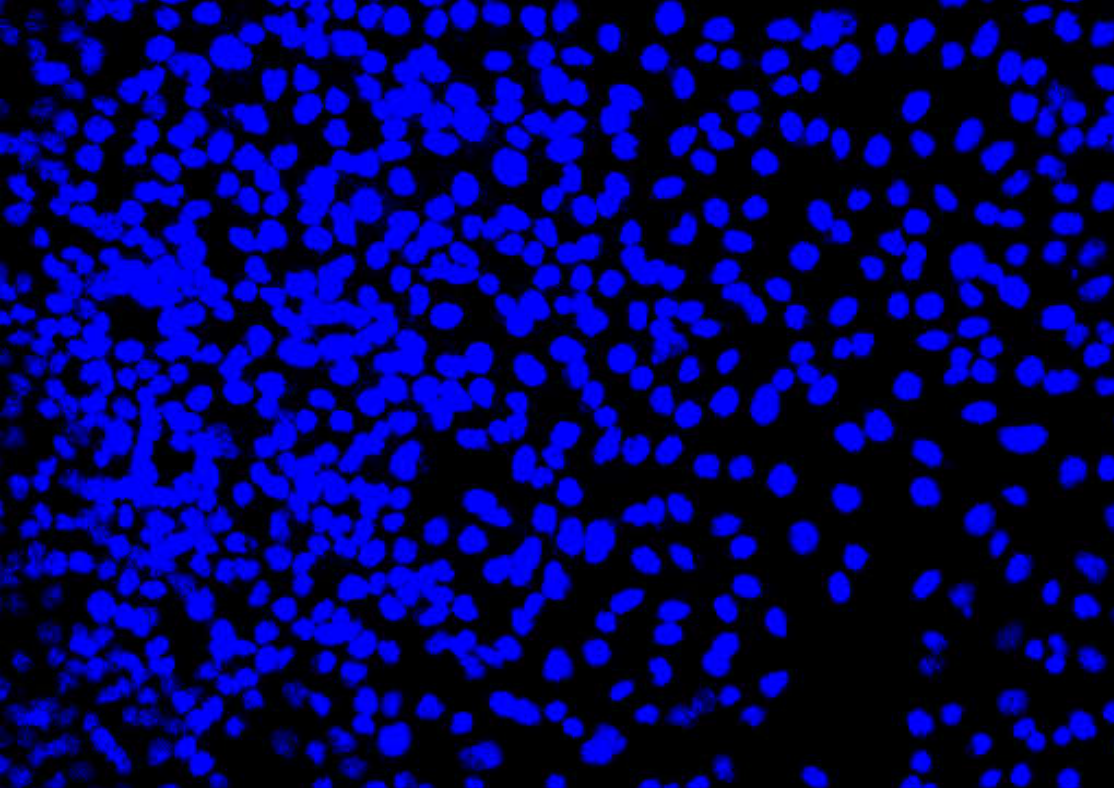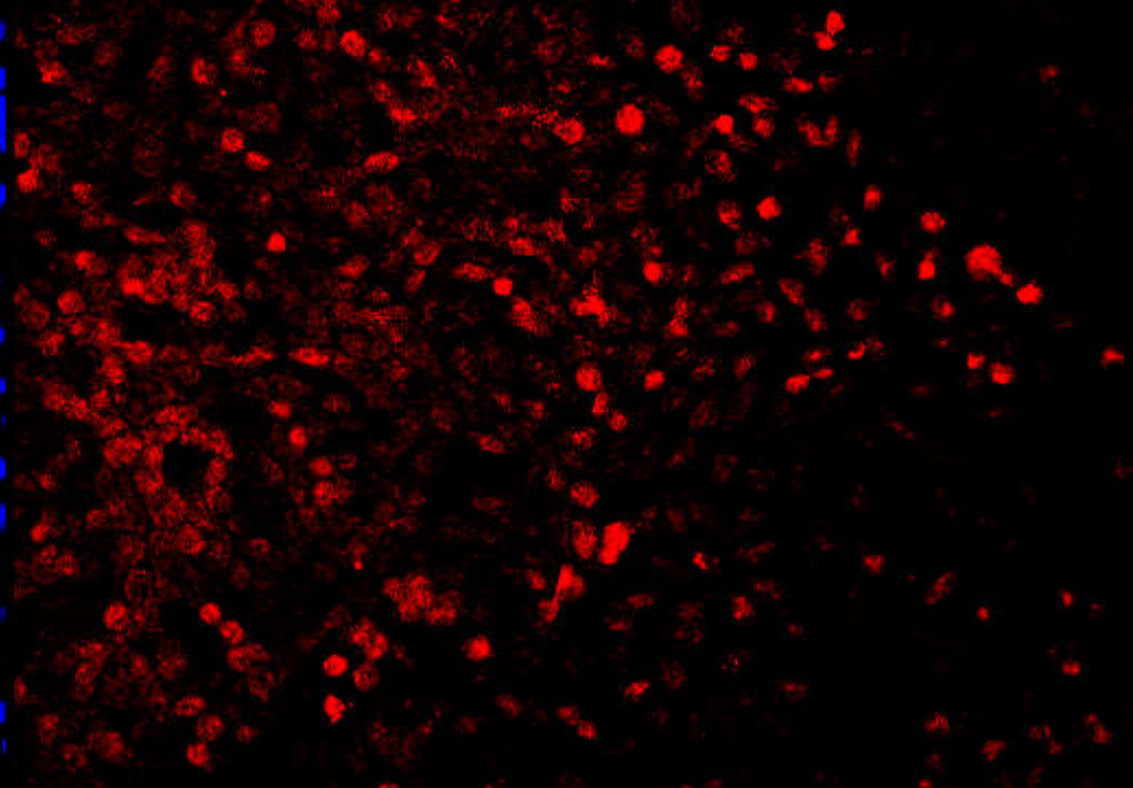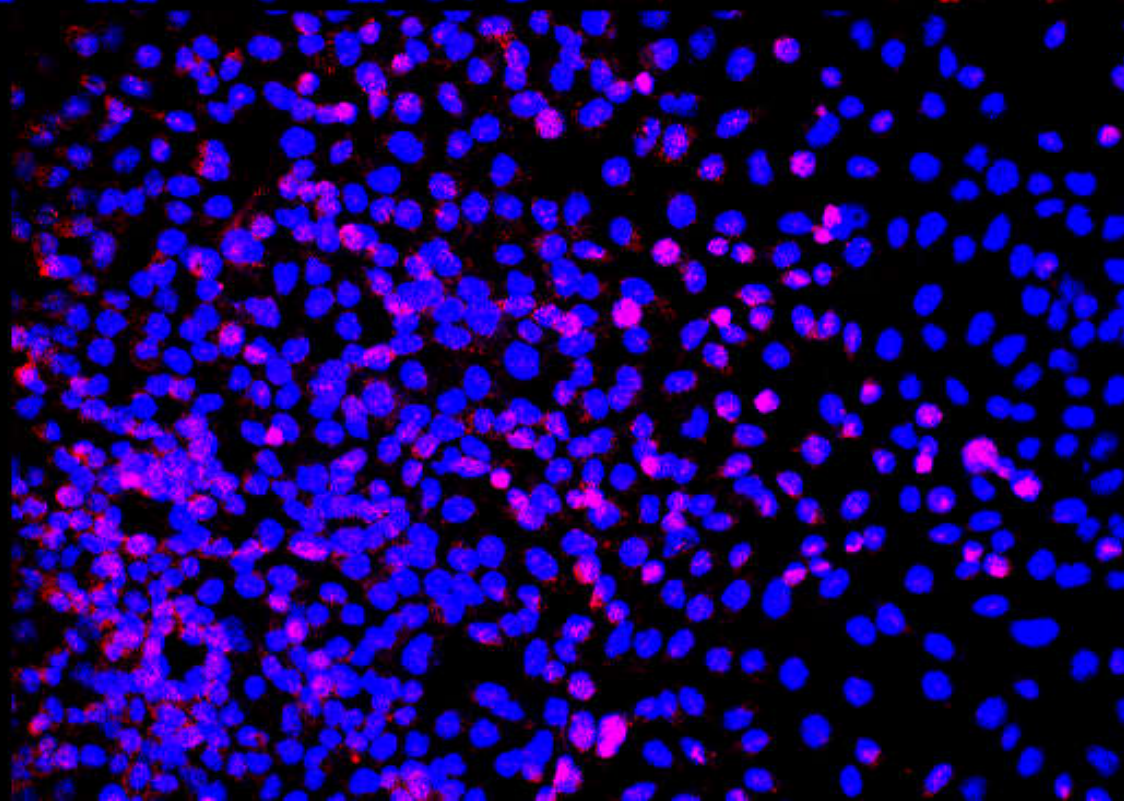







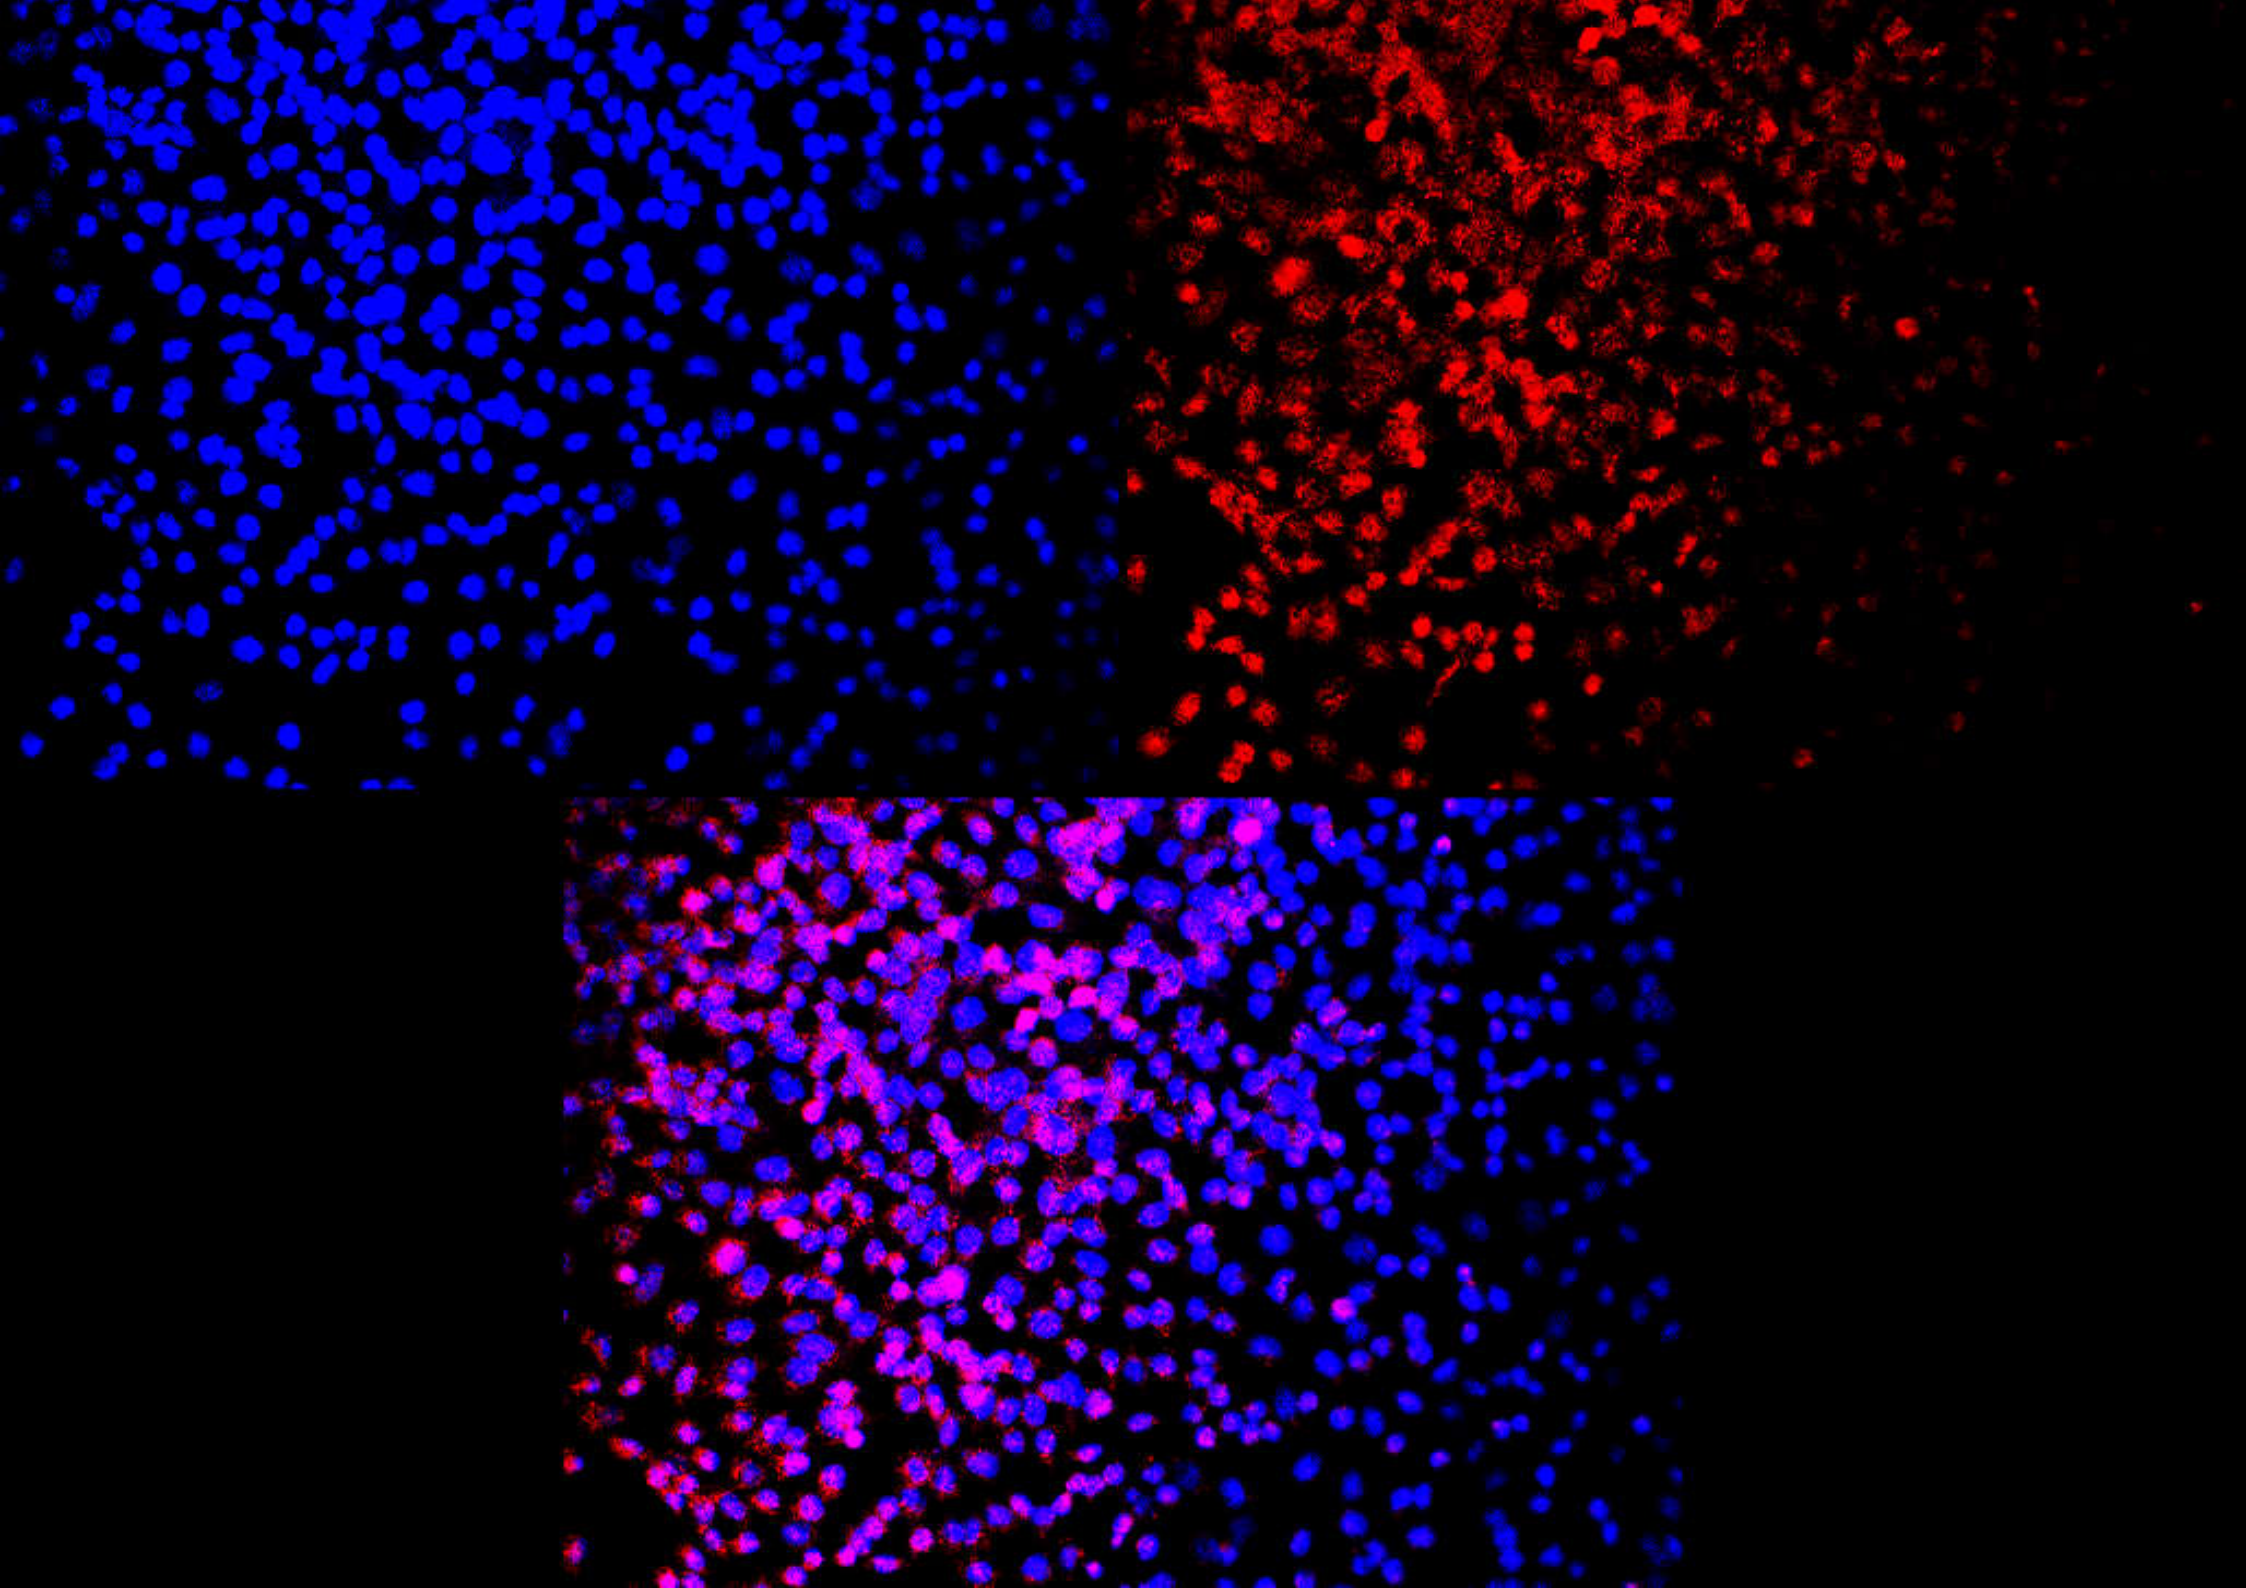





















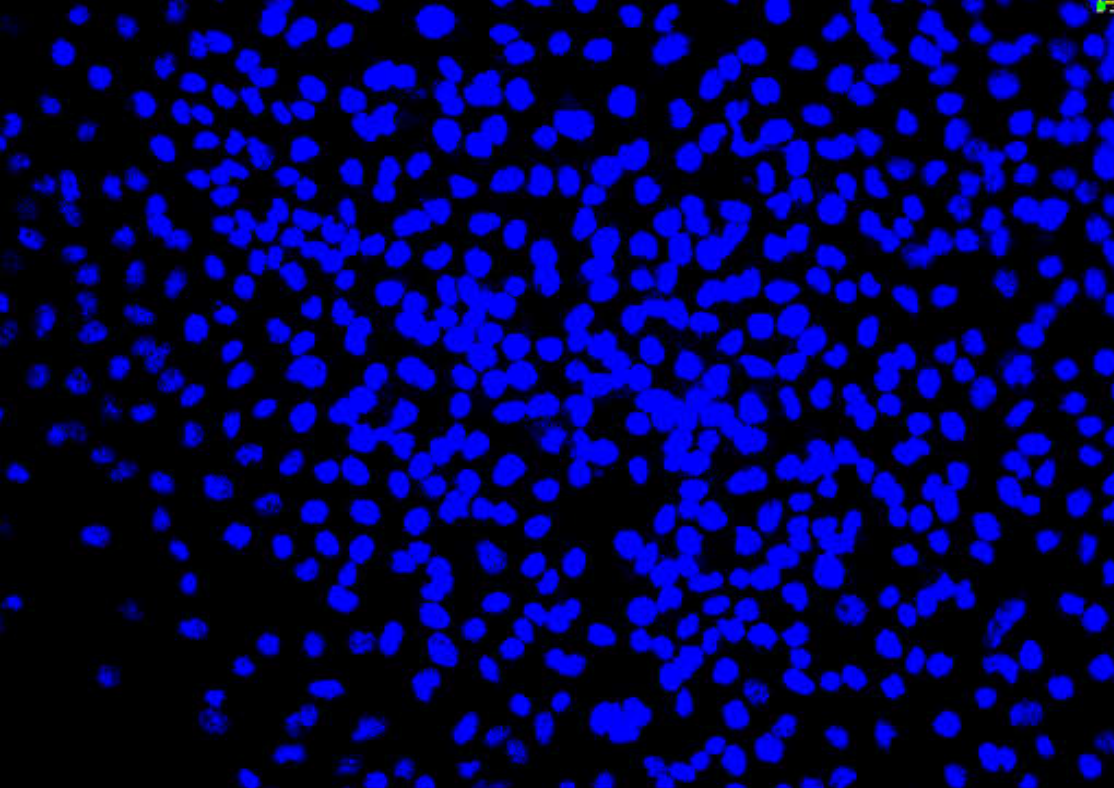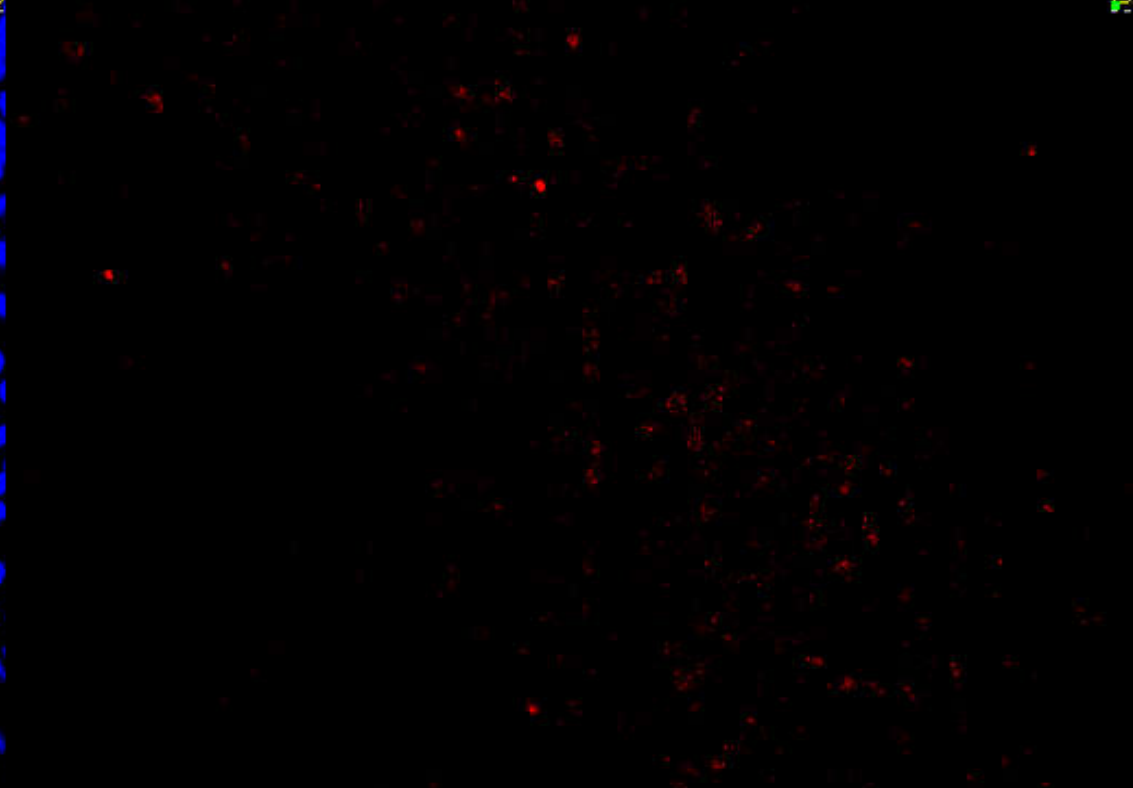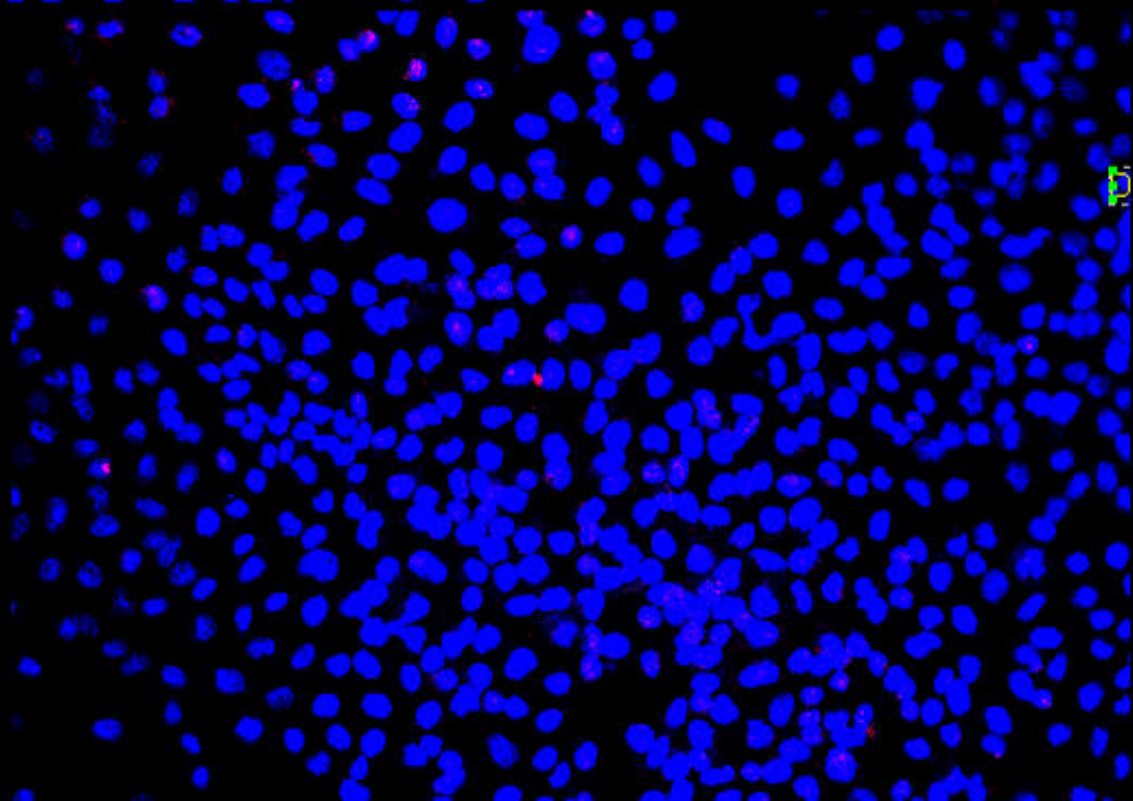







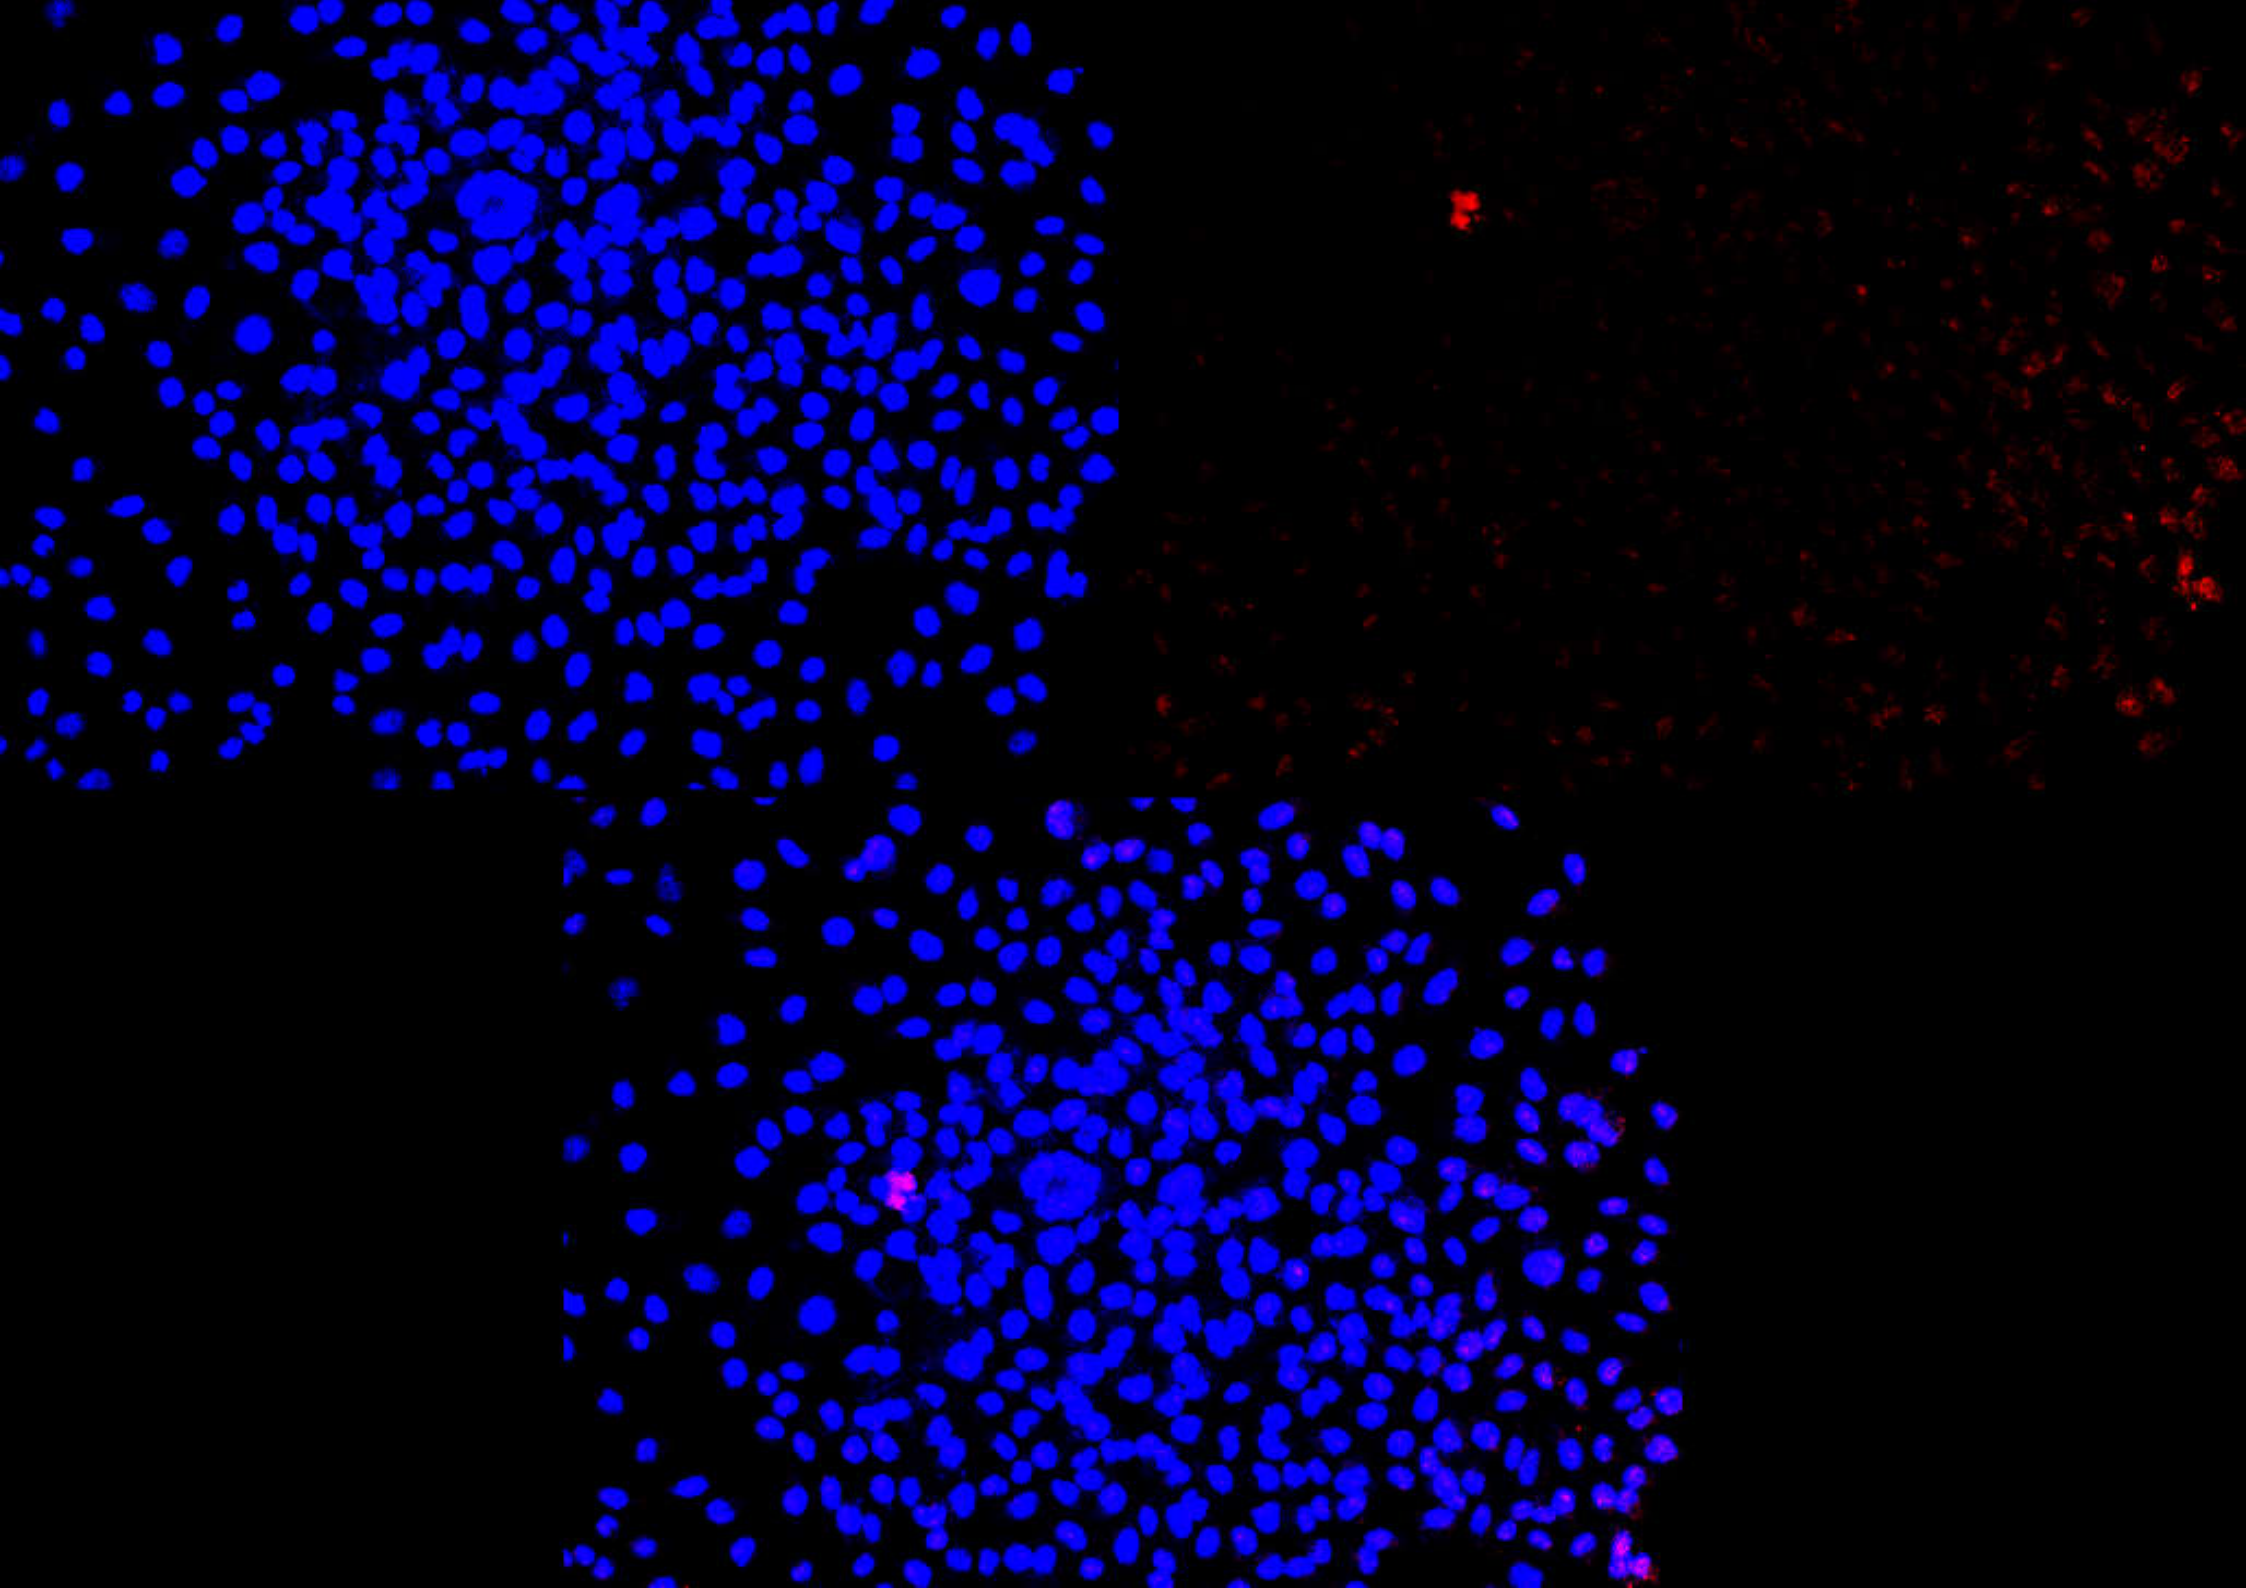





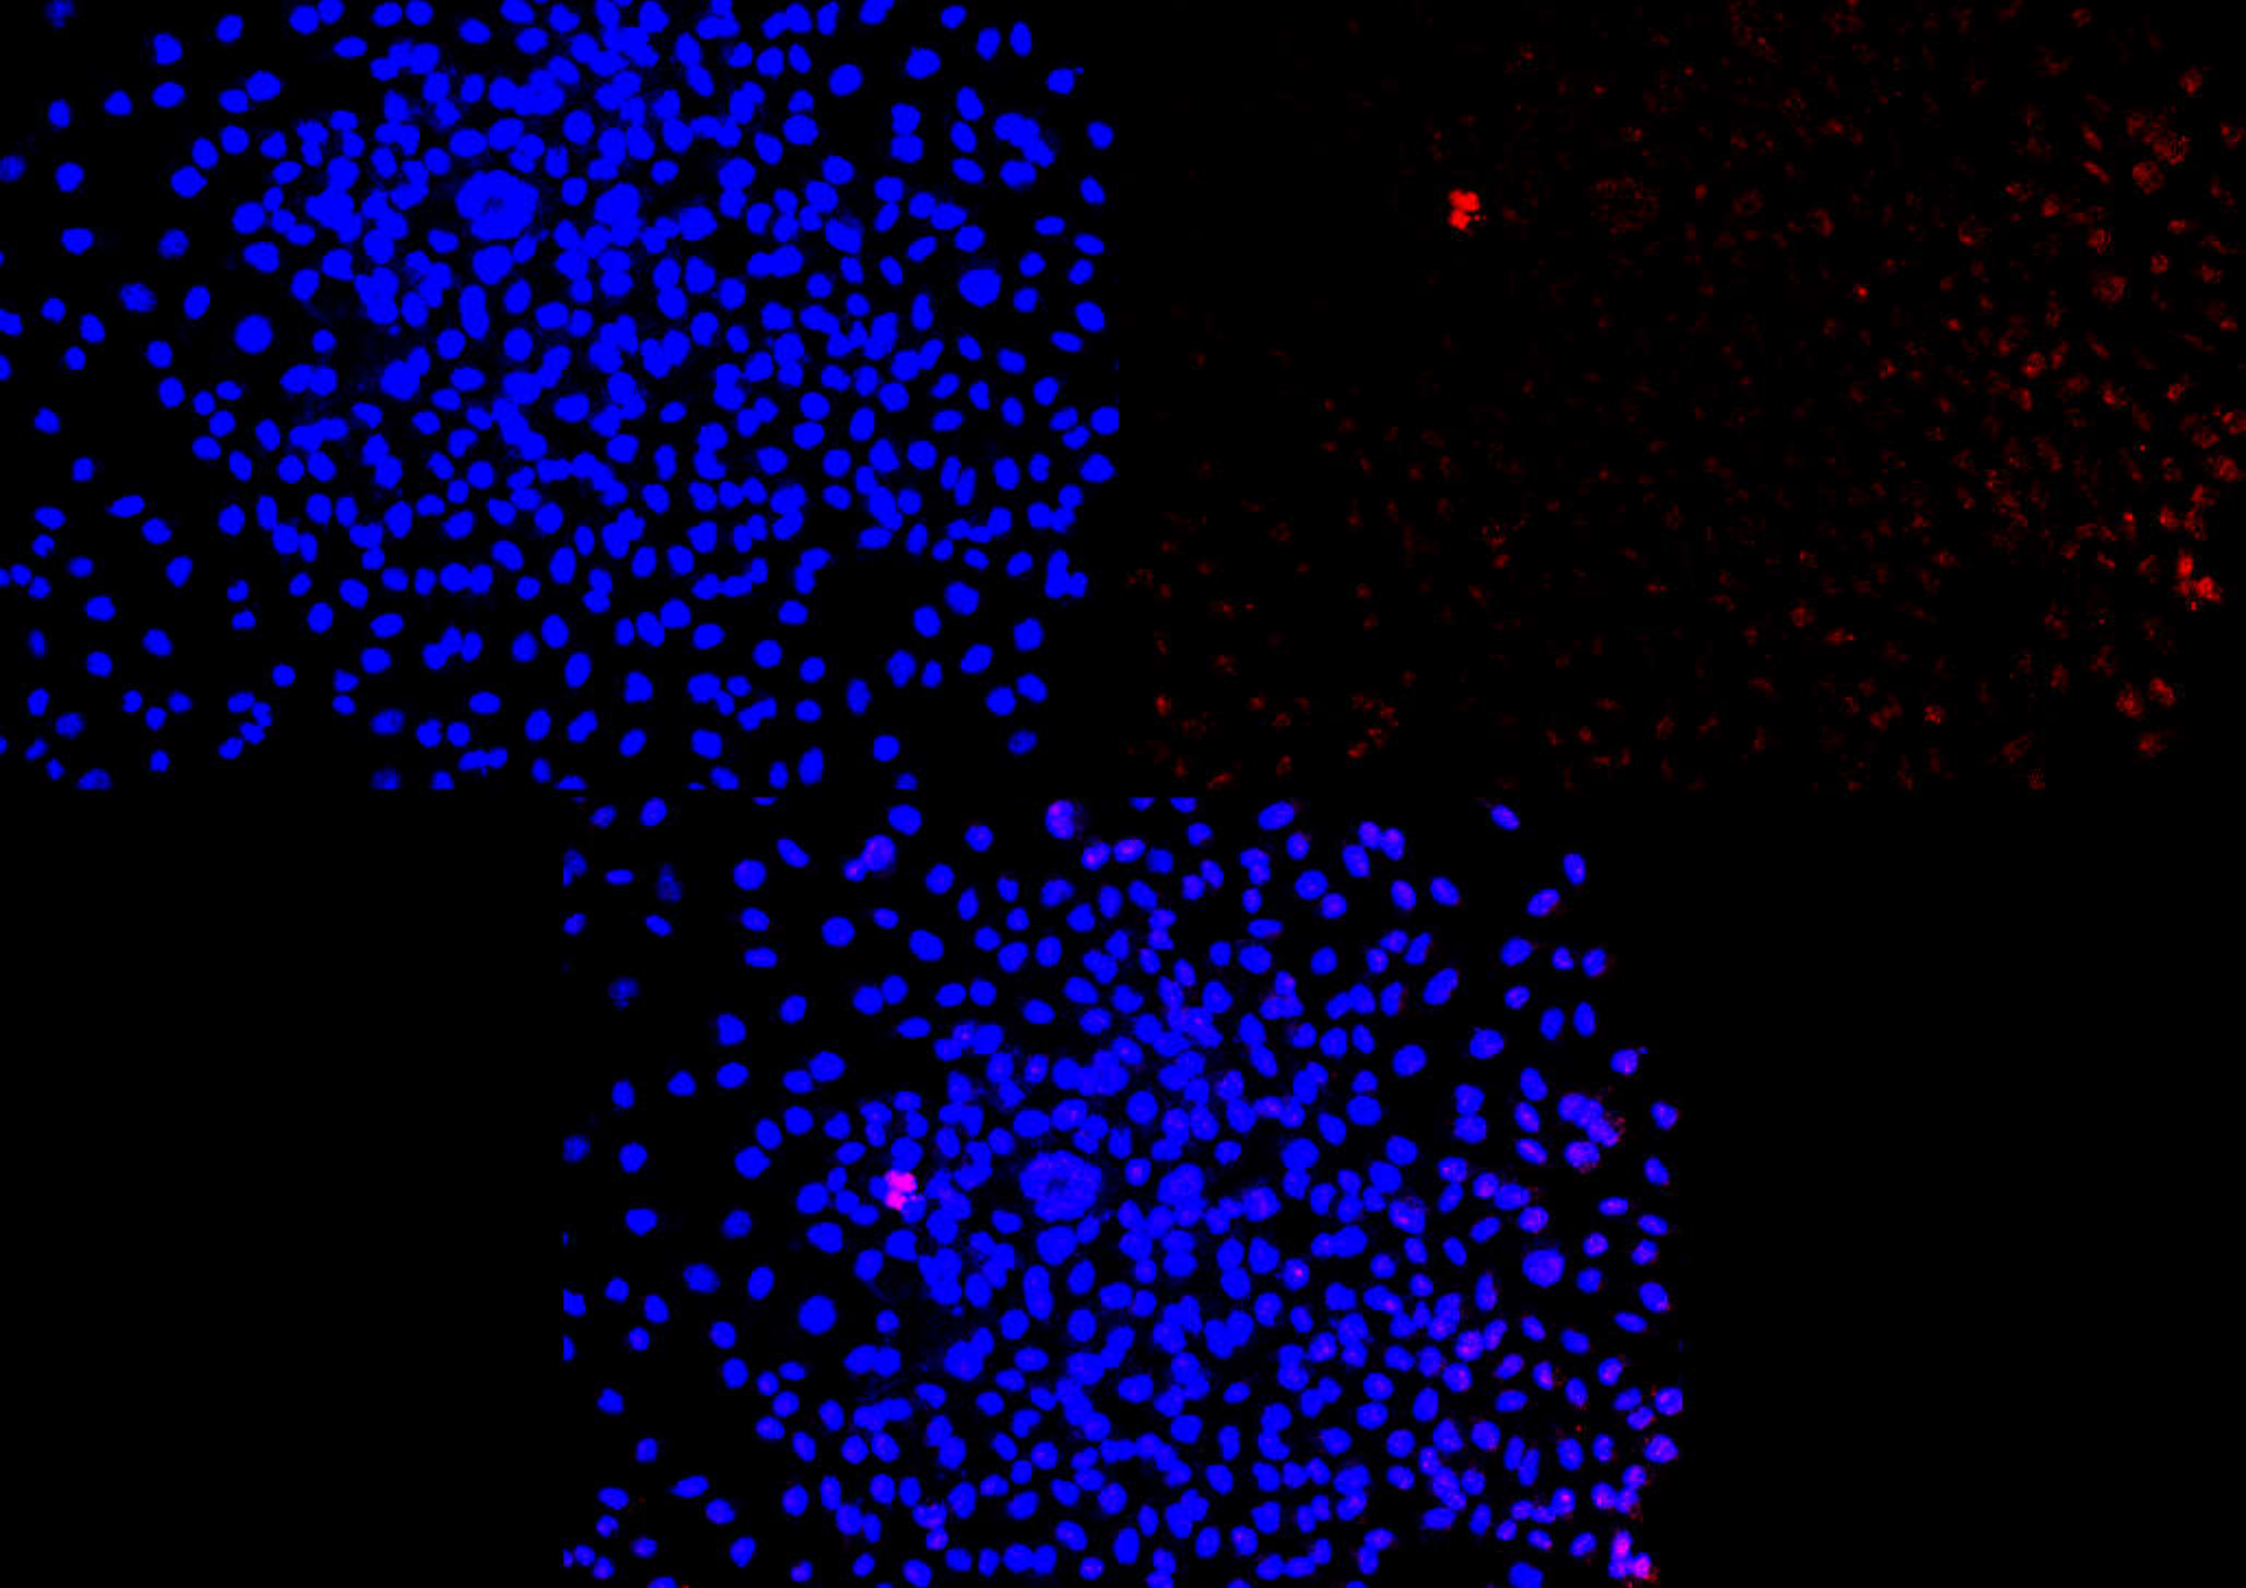













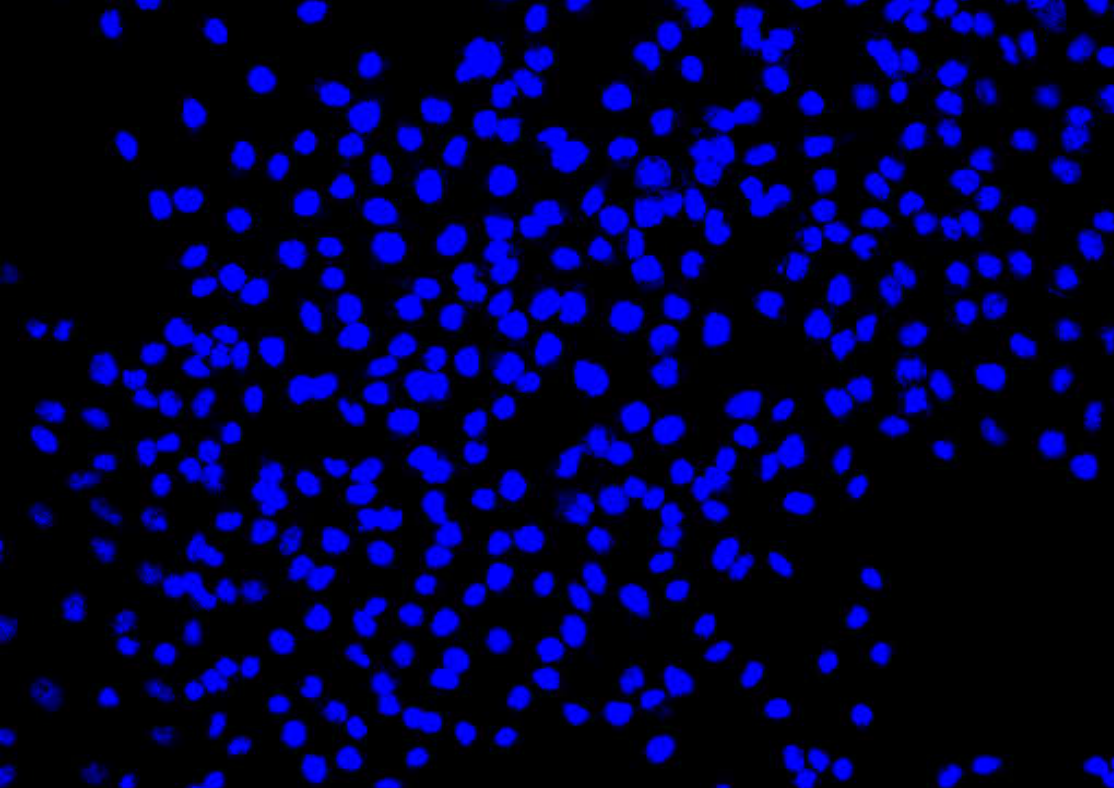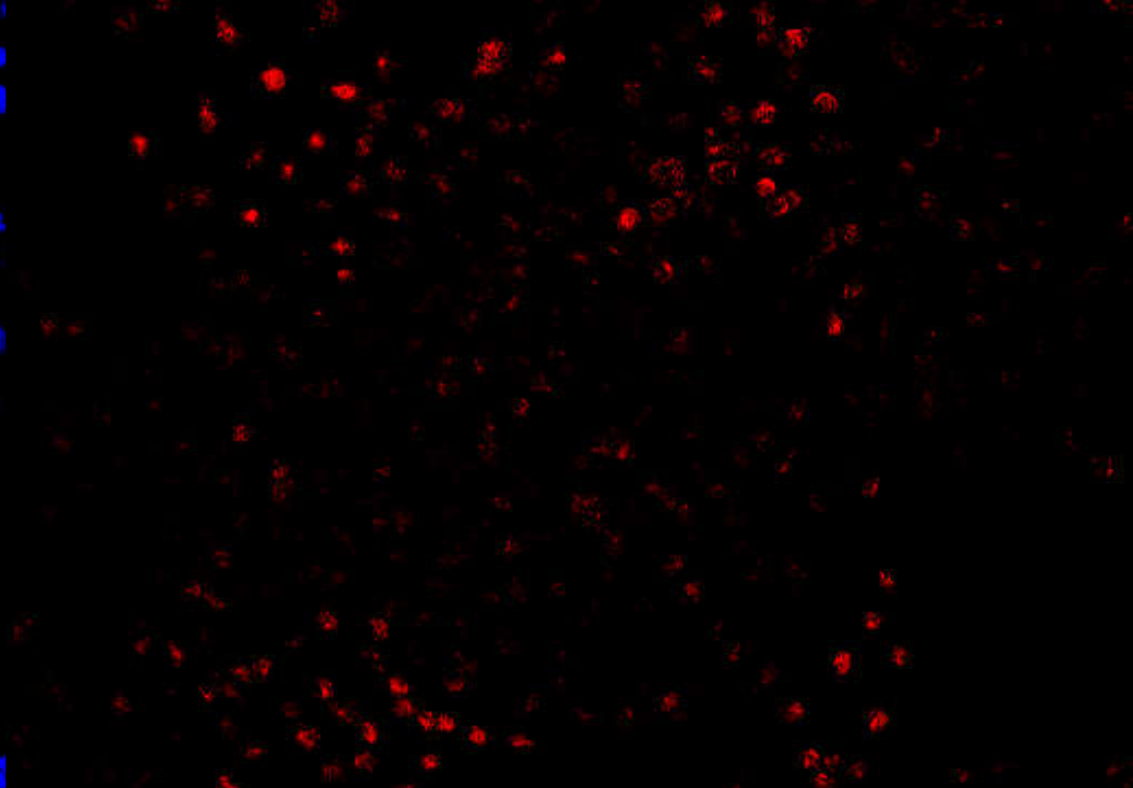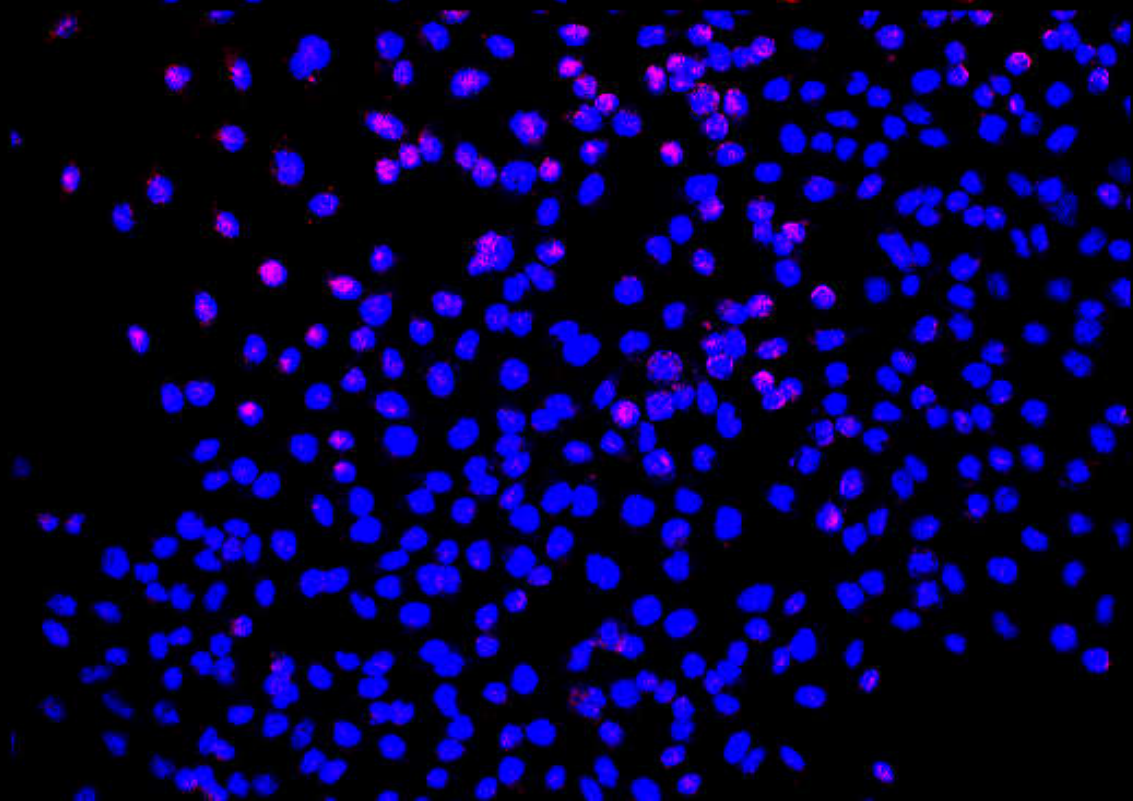

Supplement: f1 [file 3287053.f1.zip]

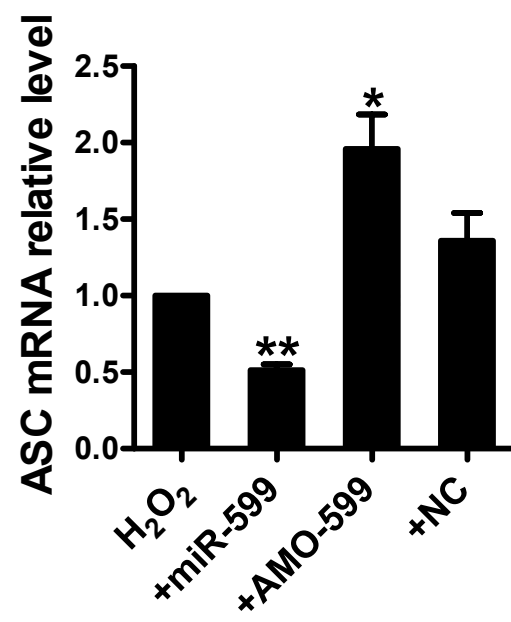

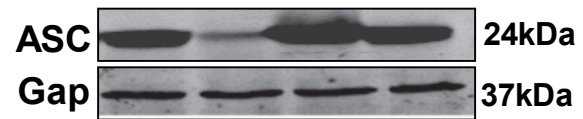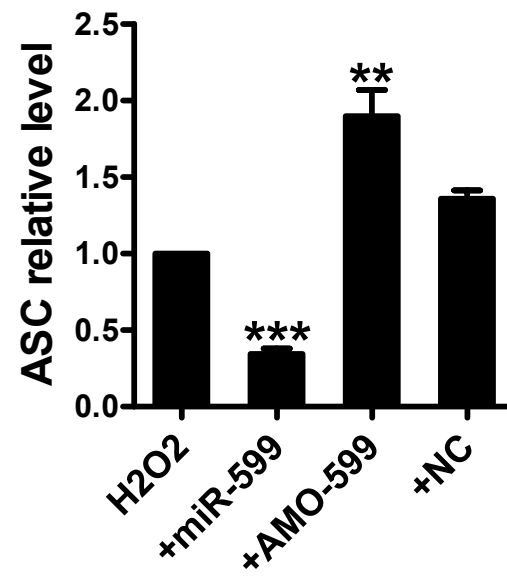

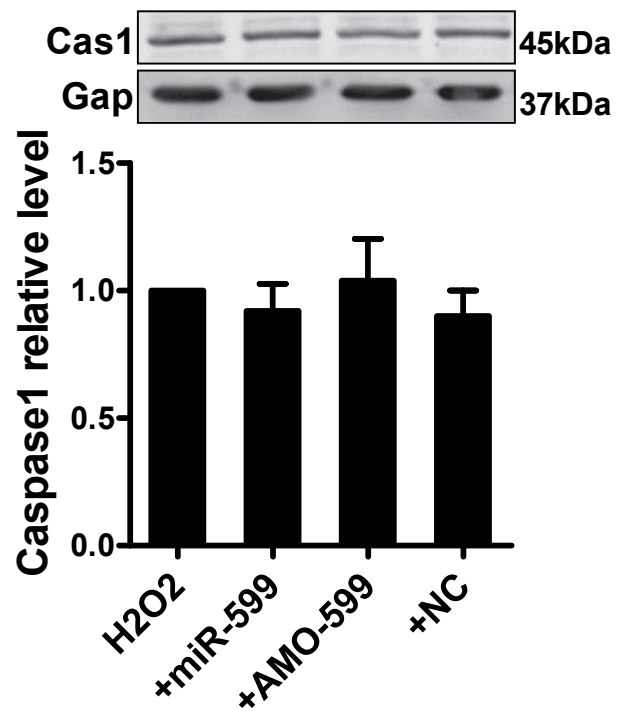

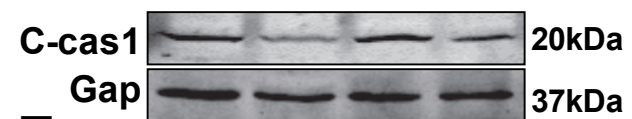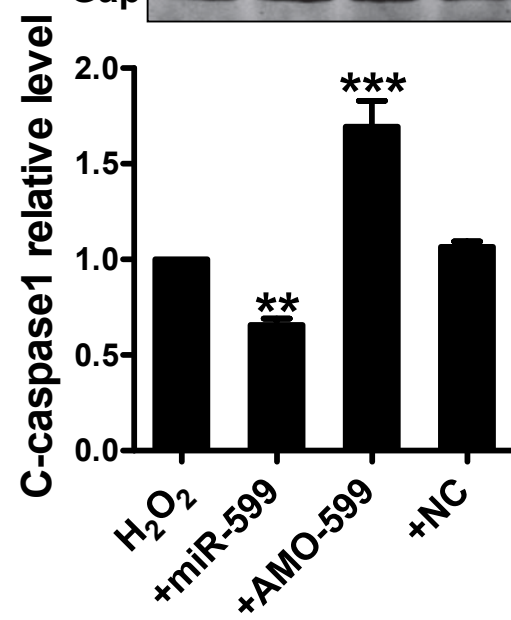

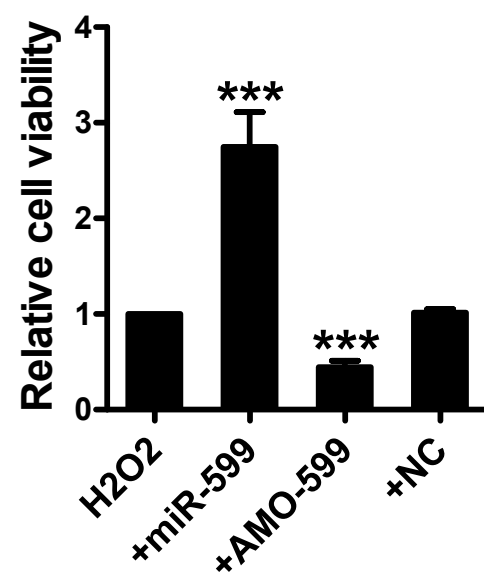

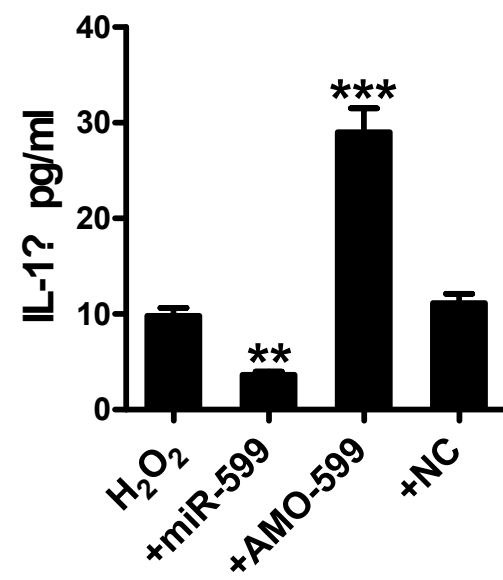

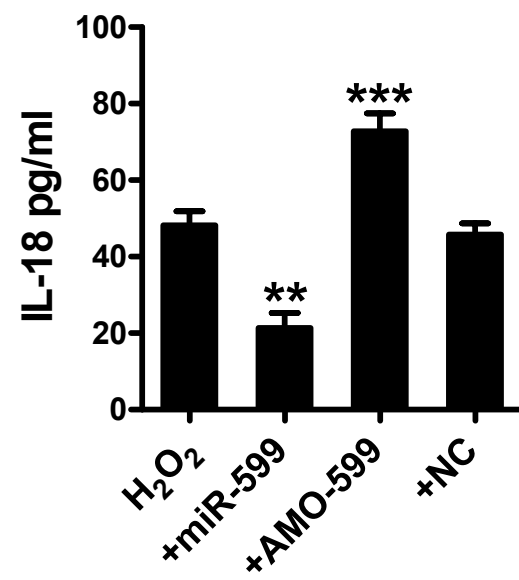

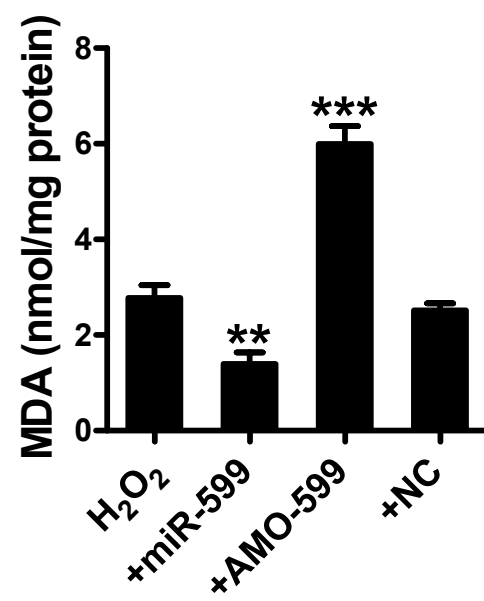



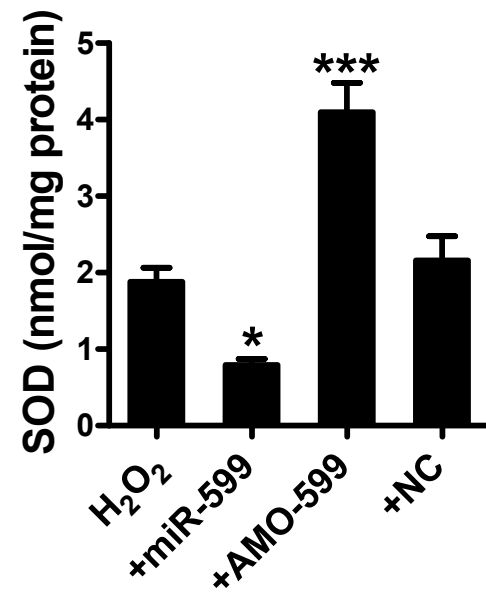

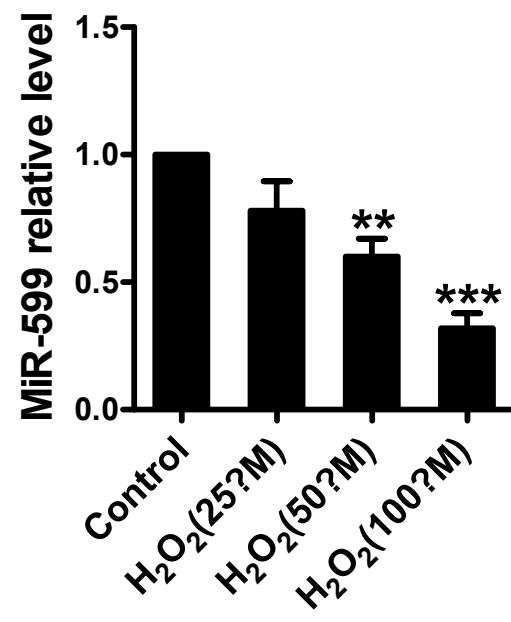

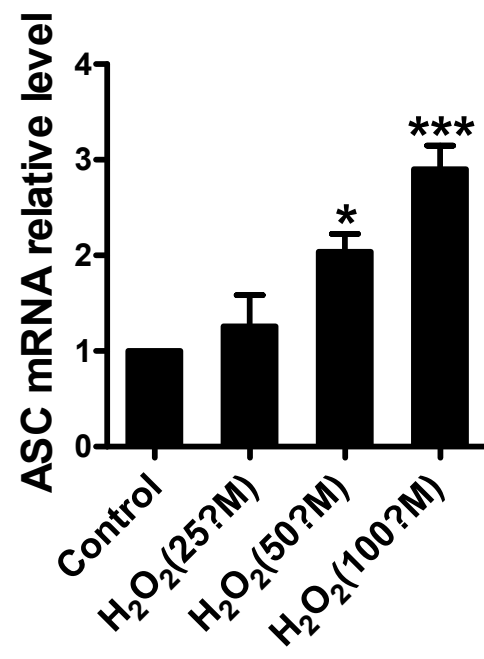

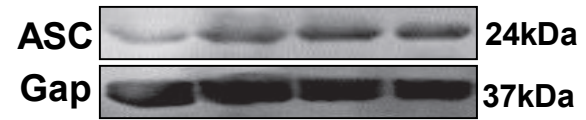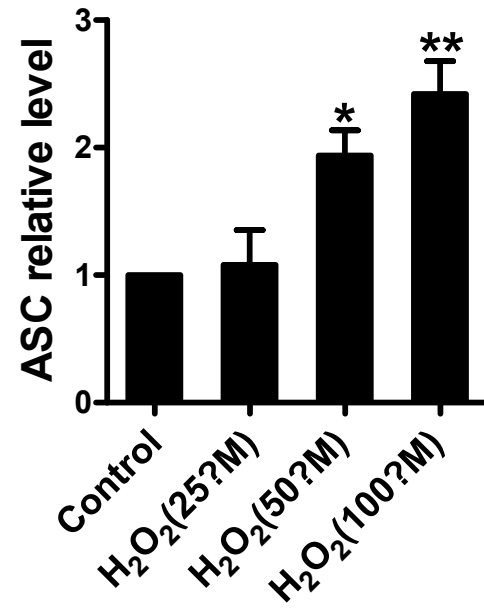

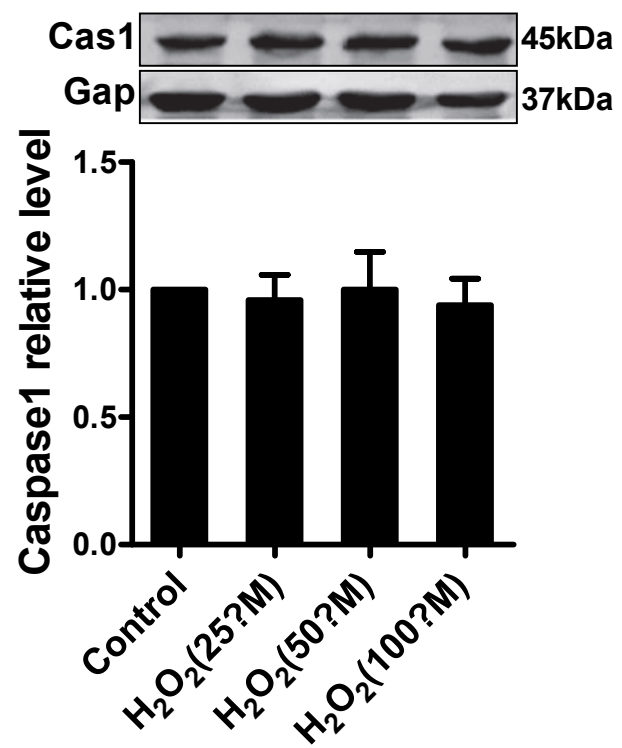

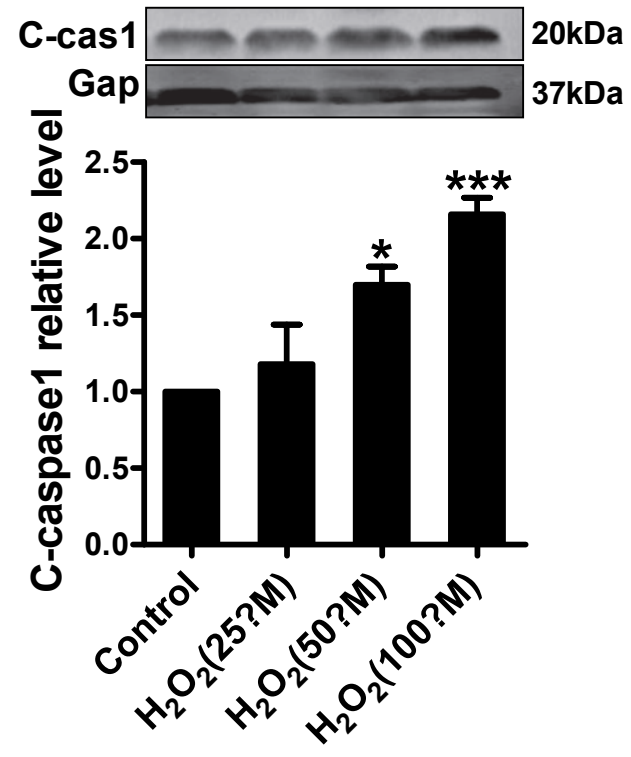

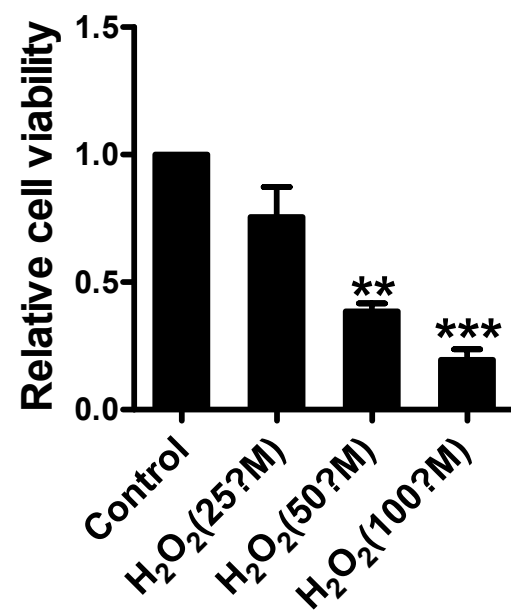

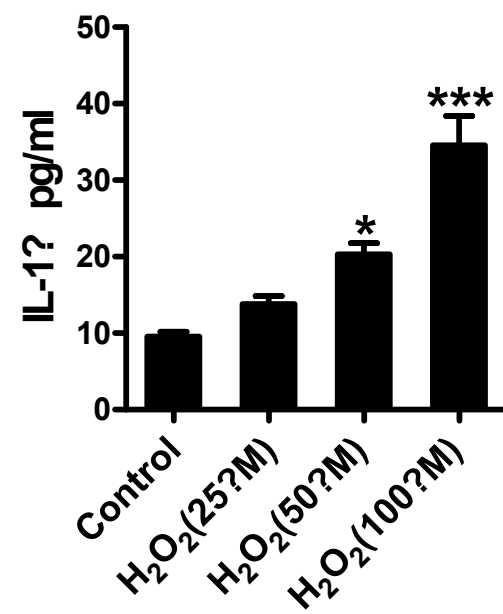



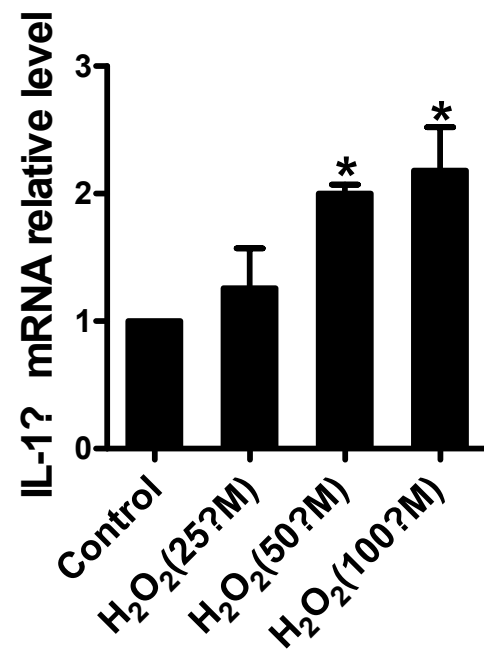

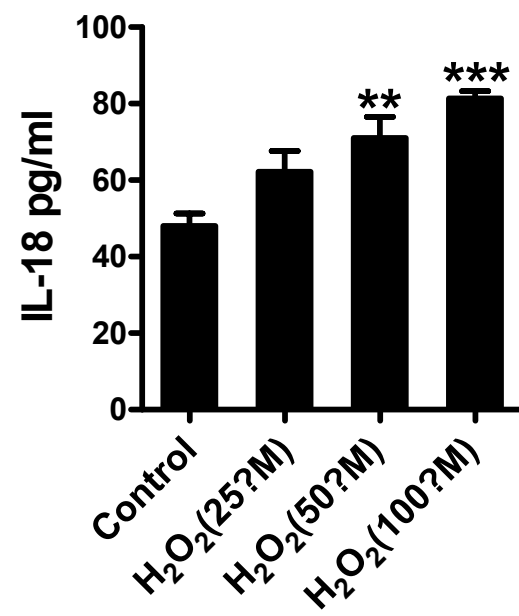

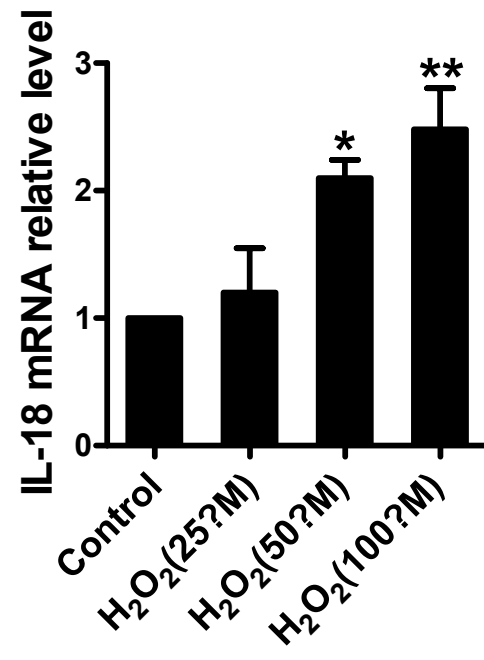

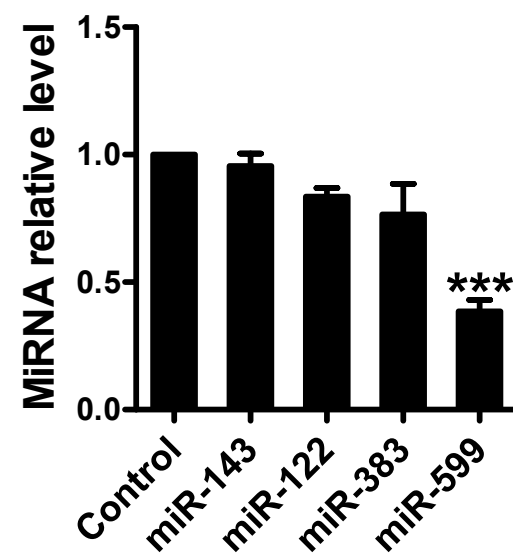

**A**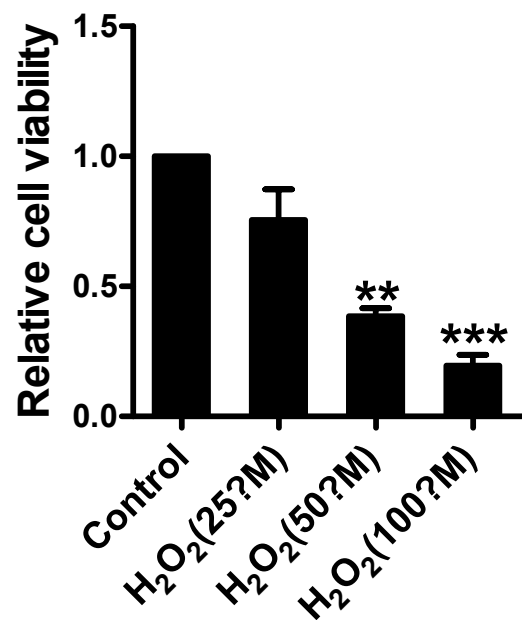**B**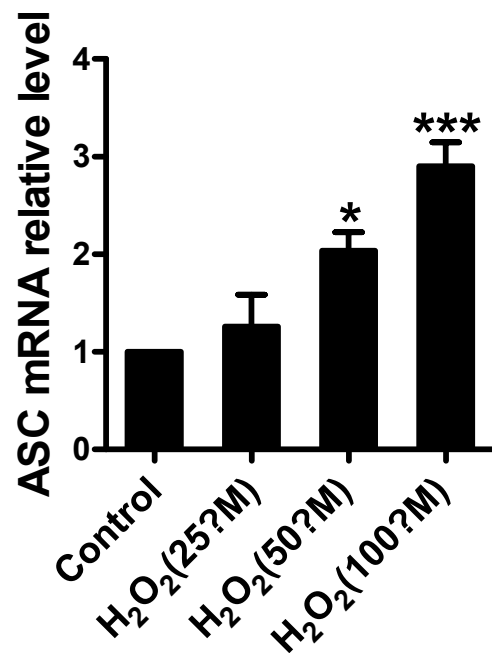**C**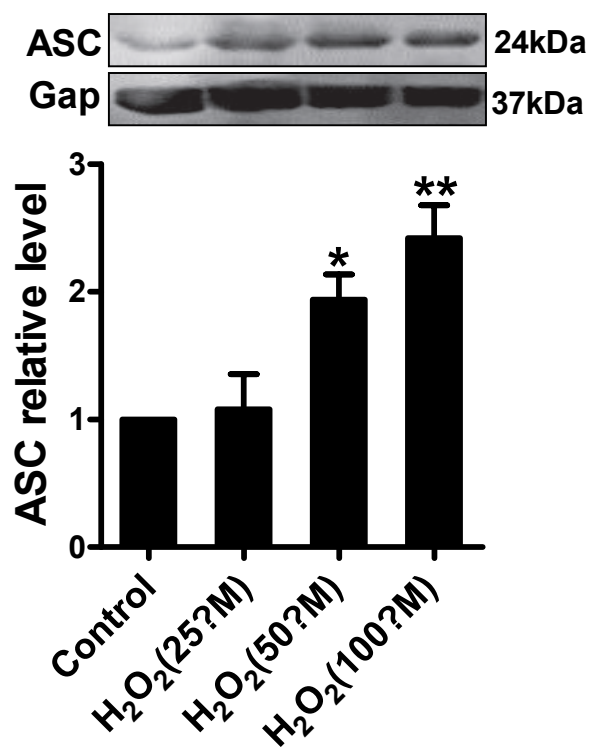**D**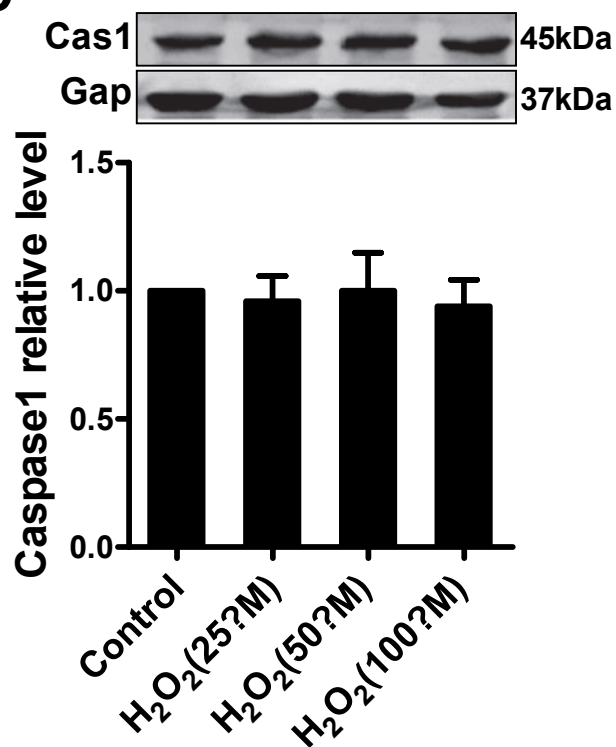**E**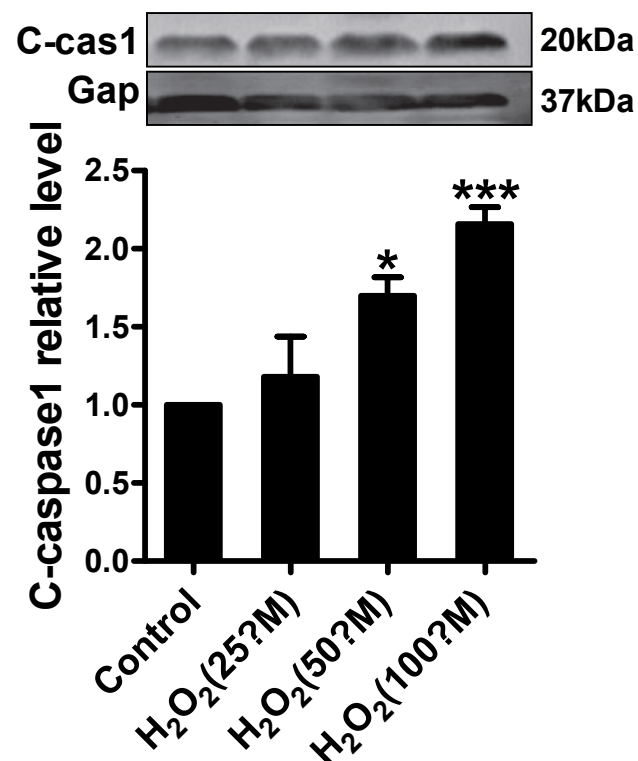

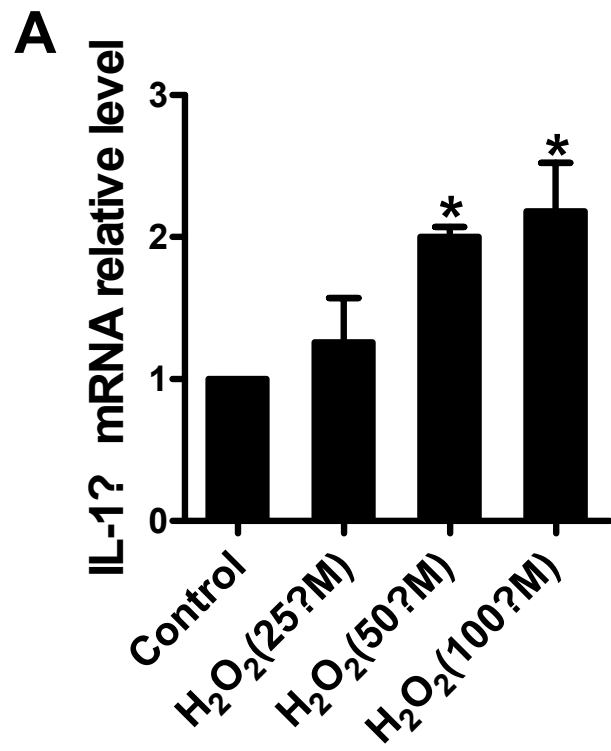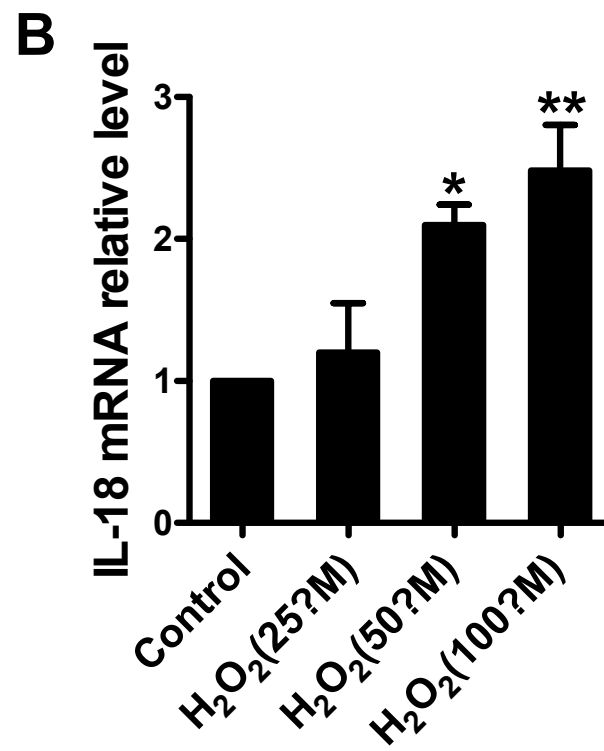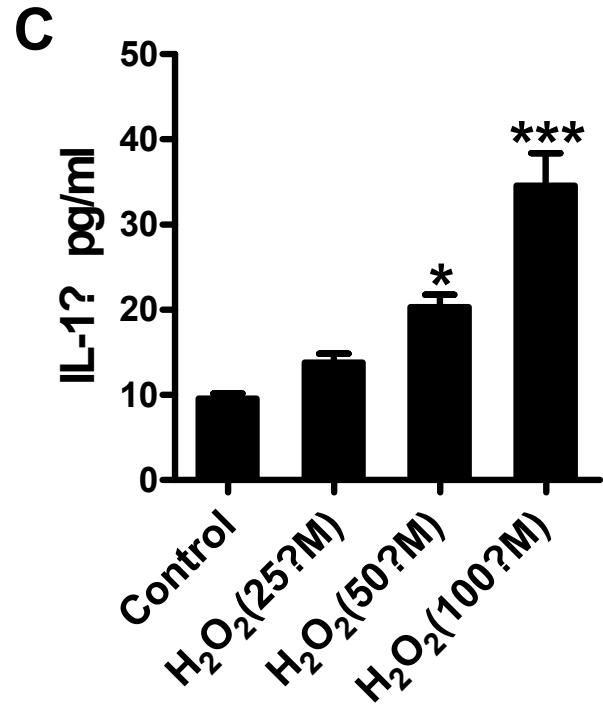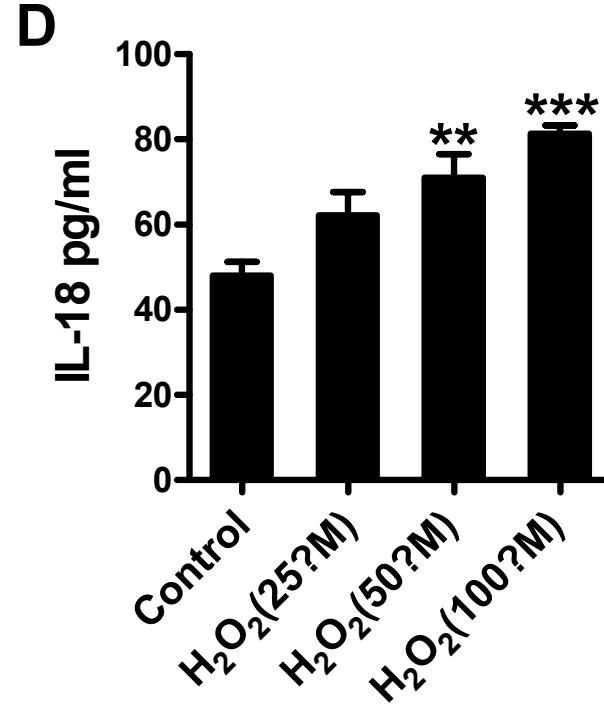

**A**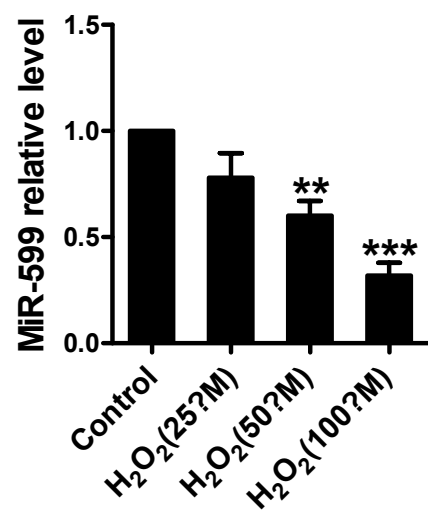**B**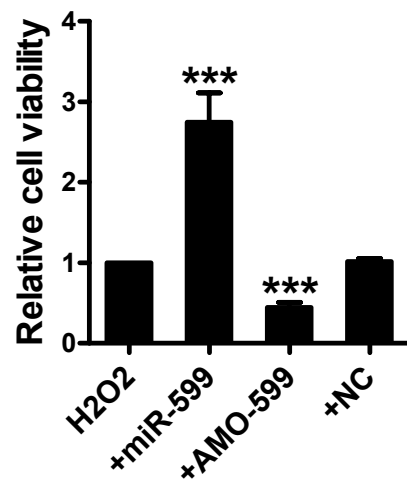**C**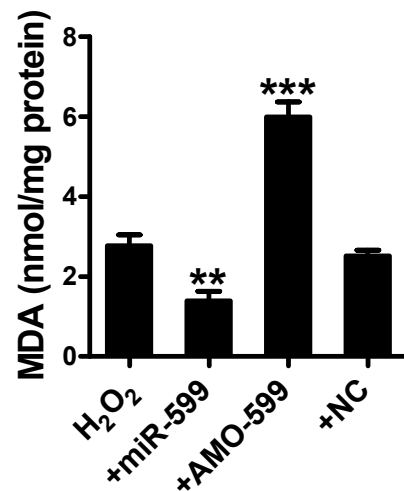**D**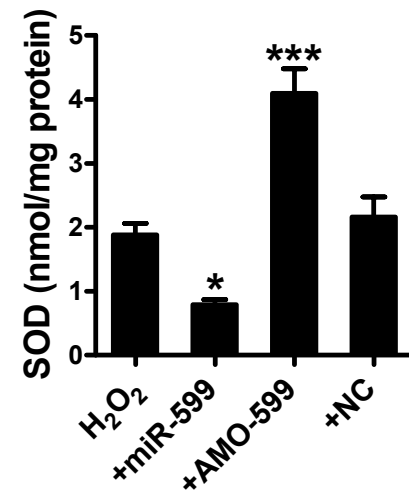**E**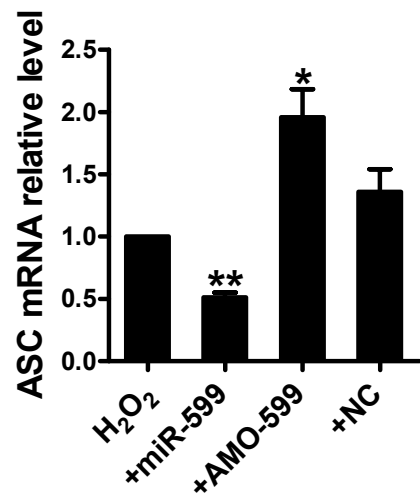**F**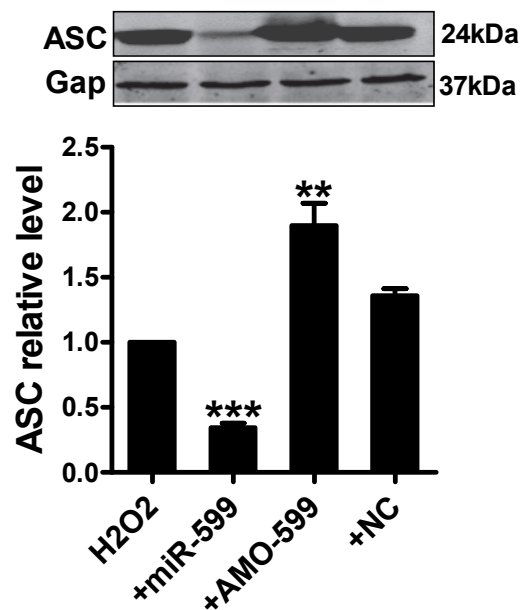**G**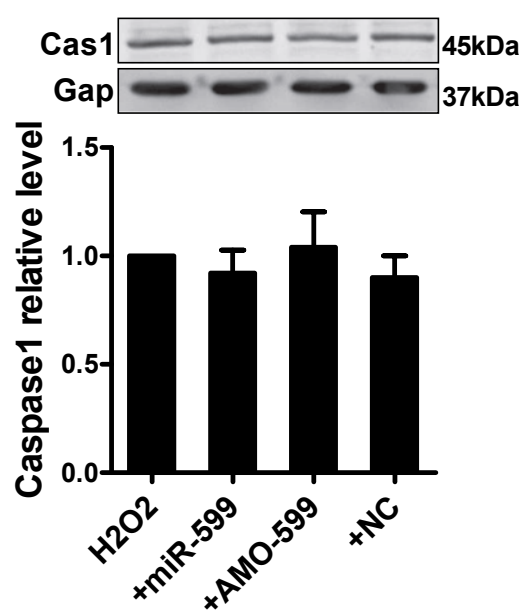**H**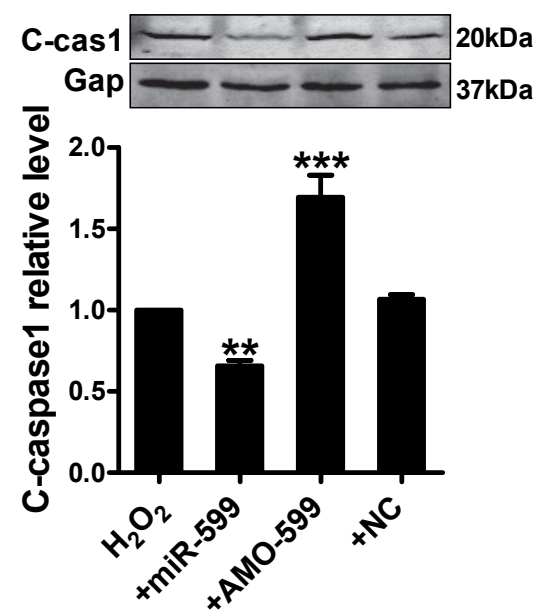

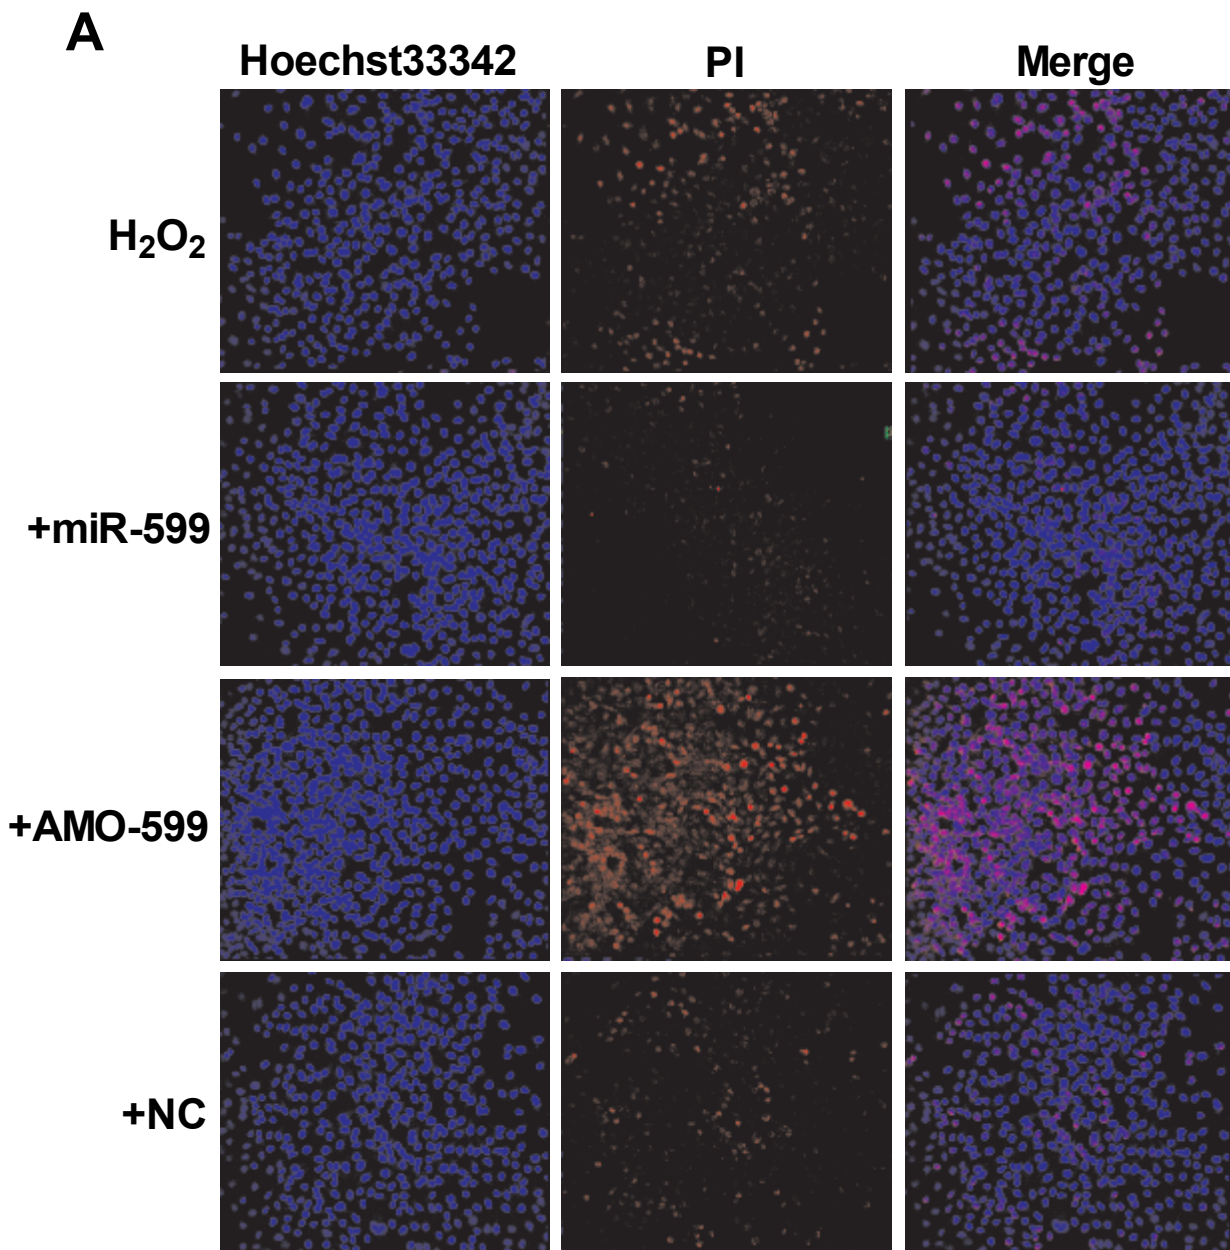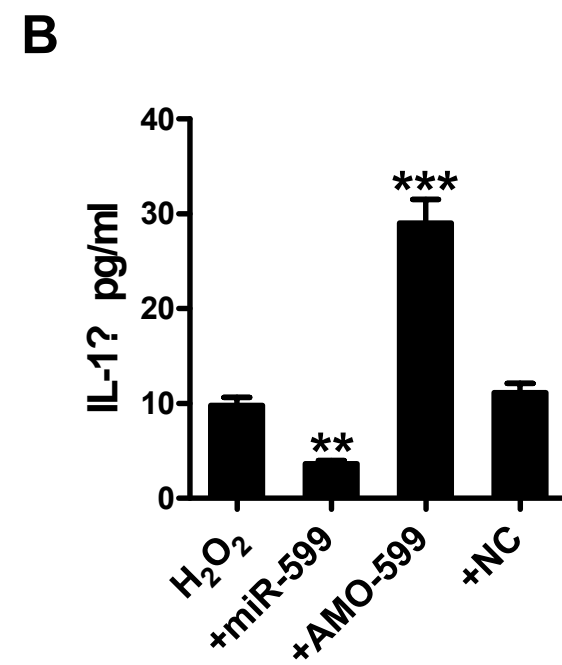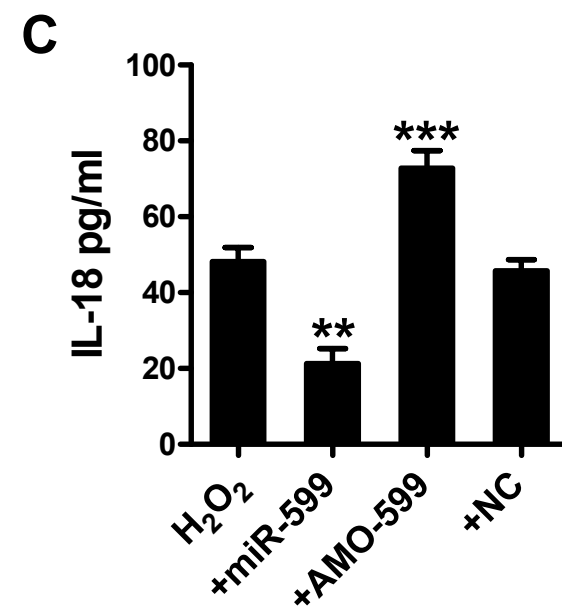

Supplement: f1 [file 3287053.f1.zip]
